# Supplementary material for: Red Blood Cell Distribution Width as a Pragmatic Marker for Outcome in Pediatric Critical Illness
Source: PLoS One. 2015 Jun 9;10(6):e0129258. doi: 10.1371/journal.pone.0129258 (PMC4461244; doi:10.1371/journal.pone.0129258)
Supplement: S4 Table — The primary data for this study are available in S4 Table. (XLS) [file pone.0129258.s005.xls]

## Sheet: Sheet1
StudyID	Age	Sex	Race	RDW	RDWGroup	Group1	Group2	Group3	Group4	Hgb	MCV	Anemic	LOS	PICULOS2	PIM2ROM	Septic	Admit Dx	Comorbid Dx	Postop	Shock	Heme_Onc	VSATDC	FirstCriticalCareatSTUDYSITE
1	5	Female	Black	14.2	2	0	1	0	0	8.75	88	1	3	LOS > 2 days	0.9	Not septic	12	5	Post-op/surgical	Yes shock	Not Onc	Survivor	1
2	0.25	Female	Hispanic	16.8	4	0	0	0	1	10.7	91.3	1	12	LOS > 2 days		Not septic	1	0	Medical	No shock	Not Onc	Survivor	1
4	3.2	Male	Black	14.2	2	0	1	0	0	10.8	80.6	1	3	LOS > 2 days		Not septic	6	0	Medical	No shock	Not Onc	Survivor	0
5	0.88	Female	White	13.9	2	0	1	0	0	17	82.5	0	9	LOS > 2 days		Not septic	2	0	Post-op/surgical	No shock	Not Onc	Survivor	1
6	16.43	Male	Black	24.9	4	0	0	0	1	7	81	1	2	LOS < 2 days		Not septic	3	0	Medical	No shock	Yes Onc	Survivor	0
8	9.45	Male	Other	14.6	3	0	0	1	0	14	81.9	0	4	LOS > 2 days		Not septic	6	0	Post-op/surgical	No shock	Yes Onc	Survivor	1
9	4.34	Male	Other	13	1	1	0	0	0	11.4	82.5	0	3	LOS > 2 days		Not septic	10	7	Medical	No shock	Not Onc	Survivor	1
11	0.63	Male	Black	17.2	4	0	0	0	1	9.1	75.5	1	2	LOS < 2 days		Not septic	6	0	Post-op/surgical	No shock	Not Onc	Survivor	1
12	0.28	Male	Black	13.7	2	0	1	0	0	15.8	75.2	0	8	LOS > 2 days		Not septic	2	0	Post-op/surgical	No shock	Not Onc	Survivor	1
13	1.3	Female	White	15	3	0	0	1	0	13.3	77.7	0	3	LOS > 2 days	3.8	Septic	11	1	Medical	No shock	Not Onc	Survivor	1
14	8	Female	White	11.9	1	1	0	0	0	9.5	73	1	3	LOS > 2 days	1	Septic	12	3	Medical	Yes shock	Yes Onc	Survivor	1
15	12.4	Male	Hispanic	14.1	2	0	1	0	0	14.7	75.6	0	2	LOS < 2 days		Not septic	1	0	Medical	No shock	Not Onc	Survivor	1
16	3.78	Male	Hispanic	13.9	2	0	1	0	0	13.1	78.2	0	1	LOS < 2 days		Not septic	7	0	Post-op/surgical	No shock	Not Onc	Survivor	1
17	0.08	Male	Hispanic	15.2	3	0	0	1	0	12.7	97.1	0	2	LOS < 2 days		Not septic	1	0	Medical	No shock	Not Onc	Survivor	1
18	4.82	Male	White	12.8	1	1	0	0	0	9.6	76.2	1	2	LOS < 2 days		Not septic	10	0	Medical	No shock	Not Onc	Survivor	1
19	13.04	Male	Hispanic	12.6	1	1	0	0	0	13.8	81.6	0	5	LOS > 2 days		Not septic	2	0	Post-op/surgical	No shock	Not Onc	Survivor	1
22	1.25	Male	White	19.9	4	0	0	0	1	13.9	83	0	10	LOS > 2 days	11.1	Not septic	11	1	Medical	Yes shock	Not Onc	Non-survivor	0
23	5.94	Male	White	14	2	0	1	0	0	10.5	82.8	1	3	LOS > 2 days		Not septic	7	0	Medical	No shock	Not Onc	Survivor	0
24	22.55	Female	Other	16.1	4	0	0	0	1	11.7	82.2	1	2	LOS < 2 days		Not septic	2	0	Medical	No shock	Yes Onc	Survivor	1
26	16.81	Male	White	13.1	1	1	0	0	0	11.7	81.6	1	2	LOS < 2 days		Not septic	4	0	Medical	No shock	Not Onc	Survivor	0
29	16.08	Male	White	13.5	2	0	1	0	0	11.5	84.8	1	2	LOS < 2 days		Not septic	8	0	Post-op/surgical	No shock	Not Onc	Survivor	1
30	12.4	Male	White	13.5	2	0	1	0	0	10.2	83.4	1	7	LOS > 2 days		Not septic	5	0	Post-op/surgical	No shock	Not Onc	Survivor	0
31	13.52	Male	White	13.7	2	0	1	0	0	10.9	85.1	1	3	LOS > 2 days		Not septic	8	0	Post-op/surgical	No shock	Not Onc	Survivor	1
33	0.08	Male	Hispanic	16.5	4	0	0	0	1	10.5	98.2	1	7	LOS > 2 days	4.1	Septic	11	1	Medical	Yes shock	Not Onc	Survivor	1
34	2.48	Female	White	14.3	2	0	1	0	0	11.6	83.7	0	1	LOS < 2 days		Not septic	2	0	Post-op/surgical	No shock	Not Onc	Survivor	1
36	16.12	Female	White	13.9	2	0	1	0	0	11.8	81.6	1	8	LOS > 2 days		Not septic	6	2	Medical	No shock	Yes Onc	Survivor	0
37	13.61	Male	White	12.2	1	1	0	0	0	14	80.2	0	9	LOS > 2 days		Not septic	2	0	Medical	No shock	Not Onc	Survivor	0
38	0.18	Male	Hispanic	14.7	3	0	0	1	0	8.2	93.1	1	2	LOS > 2 days		Not septic	12	2	Medical	No shock	Not Onc	Non-survivor	0
40	6.51	Female	White	20.5	4	0	0	0	1	8	82.2	1	2	LOS < 2 days		Not septic	6	10	Medical	No shock	Not Onc	Survivor	1
41	10.56	Male	Hispanic	13.6	2	0	1	0	0	13.1	81.4	0	10	LOS > 2 days		Not septic	1	0	Medical	No shock	Not Onc	Survivor	1
43	2.32	Male	Black	13.9	2	0	1	0	0	11.5	76.9	0	4	LOS > 2 days		Not septic	7	0	Post-op/surgical	No shock	Not Onc	Survivor	0
44	9.42	Female	Black	12.9	1	1	0	0	0	10.6	71	1	2	LOS < 2 days		Not septic	12	0	Medical	No shock	Not Onc	Survivor	0
46	2	Female	Other	16	4	0	0	0	1	12.3	78.2	0	14	LOS > 2 days	0.8	Septic	11	1	Medical	Yes shock	Not Onc	Survivor	1
51	0.87	Male	White	19.2	4	0	0	0	1	16.1	74.5	0	39	LOS > 2 days		Not septic	2	0	Post-op/surgical	No shock	Not Onc	Survivor	0
52	15.32	Male	White	13.2	1	1	0	0	0	12.2	88.5	1	2	LOS < 2 days		Not septic	2	0	Post-op/surgical	No shock	Not Onc	Survivor	1
53	9.64	Female	Hispanic	12.2	1	1	0	0	0	14.3	85.5	0	1	LOS > 2 days		Not septic	6	0	Medical	No shock	Not Onc	Non-survivor	0
56	8.6	Male	White	12.4	1	1	0	0	0	14.6	76.4	0	3	LOS > 2 days		Not septic	1	0	Medical	No shock	Not Onc	Survivor	1
57	15.65	Female	Black	16.4	4	0	0	0	1	8.1	77.6	1	3	LOS > 2 days		Not septic	2	0	Medical	No shock	Not Onc	Survivor	0
58	15	Female	White	13.8	1	1	0	0	0	11.1	92.3	1	53	LOS > 2 days		Not septic	1	0	Medical	No shock	Not Onc	Survivor	1
59	10.53	Female	White	15.6	3	0	0	1	1	10.1	81.9	1	2	LOS < 2 days		Not septic	8	0	Post-op/surgical	No shock	Not Onc	Survivor	1
60	2.15	Male	White	12.6	1	1	0	0	0	11.6	76.7	0	2	LOS < 2 days		Not septic	2	0	Post-op/surgical	No shock	Not Onc	Survivor	1
61	2.68	Female	Black	14	2	0	1	0	0	12.5	84.8	0	3	LOS > 2 days		Not septic	7	0	Medical	No shock	Not Onc	Survivor	1
62	12	Female	Hispanic	14	2	0	1	0	0	13.7	91.8	0	3	LOS > 2 days	30.6	Septic	11	1	Medical	No shock	Not Onc	Non-survivor	1
63	2.1	Female	White	15	3	0	0	1	0	9.9	74.8	1	3	LOS > 2 days		Not septic	6	3	Post-op/surgical	No shock	Yes Onc	Survivor	1
64	0.69	Female	Black	15.8	4	0	0	0	1	15.7	71	0	4	LOS > 2 days		Not septic	2	0	Post-op/surgical	No shock	Not Onc	Non-survivor	0
66	13.07	Male	White	12.9	1	1	0	0	0	8.9	84.2	1	4	LOS > 2 days		Not septic	8	0	Post-op/surgical	No shock	Not Onc	Survivor	1
68	12.88	Female	White	13.3	1	1	0	0	0	10.2	78.8	1	17	LOS > 2 days		Not septic	1	0	Medical	No shock	Not Onc	Survivor	0
69	0.13	Male	White	15.1	3	0	0	1	0	10.2	94.7	1	3	LOS > 2 days		Not septic	2	0	Post-op/surgical	No shock	Not Onc	Survivor	1
71	2.75	Female	White	14.8	3	0	0	1	0	12.4	81.5	0	4	LOS > 2 days		Not septic	2	0	Post-op/surgical	No shock	Not Onc	Survivor	1
72	2.74	Male	Black	11.6	1	1	0	0	0	8.4	78.6	1	21	LOS > 2 days		Not septic	7	0	Post-op/surgical	No shock	Not Onc	Survivor	1
73	13	Male	Hispanic	12.9	1	1	0	0	0	11.1	89.9	1	94	LOS > 2 days		Not septic	1	0	Medical	No shock	Not Onc	Survivor	1
74	15	Female	Hispanic	14.3	2	0	1	0	0	11.2	101.3	1	7	LOS > 2 days	13.5	Septic	11	3	Medical	Yes shock	Yes Onc	Survivor	0
75	1.4	Female	Black	16.1	4	0	0	0	1	9.1	75.9	1	29	LOS > 2 days	14.2	Septic	11	6	Medical	Yes shock	Not Onc	Survivor	0
77	0.36	Female	Hispanic	14.4	3	0	0	1	0	9.2	76.9	1	6	LOS > 2 days		Not septic	1	0	Medical	No shock	Not Onc	Survivor	0
78	2	Female	Hispanic	15.7	3	0	0	1	1	8.9	79.1	1	15	LOS > 2 days	9.2	Septic	11	5	Post-op/surgical	Yes shock	Not Onc	Survivor	1
80	18.47	Male	White	13.1	1	1	0	0	0	12.5	84.4	1	2	LOS < 2 days		Not septic	8	0	Post-op/surgical	No shock	Not Onc	Survivor	1
81	11.9	Male	Black	13.2	1	1	0	0	0	11.6	83.4	0	4	LOS > 2 days		Not septic	2	0	Post-op/surgical	No shock	Not Onc	Survivor	1
82	0.12	Male	Black	14.8	3	0	0	1	0	9.8	82.9	1	29	LOS > 2 days	6.06	Not septic	2	0	Medical	No shock	Not Onc	Survivor	1
86	14.12	Male	White	16.2	4	0	0	0	1	10.4	84.3	1	2	LOS < 2 days		Not septic	4	0	Post-op/surgical	No shock	Not Onc	Survivor	1
87	3.71	Male	Other	17	4	0	0	0	1	3.2	84	1	3	LOS > 2 days		Not septic	3	0	Medical	No shock	Yes Onc	Survivor	0
89	6.53	Male	White	12.1	1	1	0	0	0	13.5	84	0	1	LOS < 2 days		Not septic	6	0	Medical	No shock	Not Onc	Survivor	1
90	16	Female	Black	14.6	3	0	0	1	0	10.5	79.7	1	7	LOS > 2 days	1	Septic	11	3	Medical	Yes shock	Yes Onc	Survivor	1
91	14.68	Male	Black	14.7	3	0	0	1	0	13.8	66.9	0	5	LOS > 2 days		Not septic	10	0	Medical	No shock	Not Onc	Survivor	1
92	13.85	Female	White	13.3	1	1	0	0	0	13	94.4	0	1	LOS < 2 days		Not septic	6	0	Medical	No shock	Not Onc	Survivor	1
93	11.61	Male	Hispanic	12.8	1	1	0	0	0	11.4	87.4	1	2	LOS < 2 days		Not septic	2	0	Post-op/surgical	No shock	Not Onc	Survivor	1
94	15.83	Female	Hispanic	14.1	2	0	1	0	0	12.6	82.8	0	1	LOS < 2 days		Not septic	6	0	Medical	No shock	Not Onc	Survivor	1
96	4.16	Male	White	14.3	2	0	1	0	0	9.2	77.9	1	1	LOS < 2 days		Not septic	6	0	Post-op/surgical	No shock	Not Onc	Survivor	1
98	0.25	Female	Black	18.1	4	0	0	0	1	11	89.5	1	13	LOS > 2 days	1.1	Septic	11	1	Medical	Yes shock	Not Onc	Non-survivor	1
99	13.45	Male	White	14.7	3	0	0	1	0	11	79.8	1	1	LOS < 2 days		Not septic	6	0	Post-op/surgical	No shock	Not Onc	Survivor	1
103	0.64	Male	White	13.5	2	0	1	0	0	14.4	83.6	0	3	LOS > 2 days		Not septic	2	0	Medical	No shock	Not Onc	Survivor	0
104	3.48	Female	White	14.1	2	0	1	0	0	11.3	77.7	0	1	LOS < 2 days		Not septic	10	0	Post-op/surgical	No shock	Not Onc	Survivor	0
107	1.57	Female	Hispanic	16.5	4	0	0	0	1	8.1	85.2	1	2	LOS < 2 days		Not septic	6	3	Post-op/surgical	No shock	Not Onc	Survivor	1
108	16	Male	Hispanic	14.4	3	0	0	1	0	13.8	87.6	0	22	LOS > 2 days	3.6	Septic	11	1	Medical	Yes shock	Not Onc	Survivor	1
109	6.3	Male	White	12.9	1	1	0	0	0	12	82.4	0	5	LOS > 2 days		Not septic	1	0	Medical	No shock	Not Onc	Survivor	0
110	4.33	Male	White	12.6	1	1	0	0	0	12	81.2	0	5	LOS > 2 days		Not septic	1	0	Medical	No shock	Not Onc	Survivor	1
112	3.41	Male	Black	13	1	1	0	0	0	11.2	76.5	0	2	LOS < 2 days		Not septic	6	0	Medical	No shock	Not Onc	Survivor	0
113	4.45	Male	White	12.1	1	1	0	0	0	12.2	74.7	0	9	LOS > 2 days		Not septic	6	0	Medical	No shock	Not Onc	Non-survivor	0
115	8.05	Male	White	12.4	1	1	0	0	0	11.2	78.7	1	3	LOS > 2 days		Not septic	9	5	Medical	No shock	Not Onc	Survivor	1
116	11.59	Male	White	12.4	1	1	0	0	0	13	86.3	0	3	LOS > 2 days		Not septic	5	0	Medical	No shock	Not Onc	Survivor	1
118	15.47	Female	White	13.5	2	0	1	0	0	11.1	81.7	1	4	LOS > 2 days		Not septic	8	0	Post-op/surgical	No shock	Not Onc	Survivor	1
119	13.42	Female	Black	13.7	2	0	1	0	0	10.4	77	1	1	LOS < 2 days		Not septic	2	0	Post-op/surgical	No shock	Not Onc	Survivor	1
120	16.2	Male	Hispanic	14.2	2	0	1	0	0	11.2	77.1	1	3	LOS > 2 days		Not septic	8	0	Post-op/surgical	No shock	Not Onc	Survivor	1
121	10.99	Male	White	15.1	3	0	0	1	0	9.4	80.8	1	5	LOS > 2 days		Not septic	2	0	Post-op/surgical	No shock	Not Onc	Survivor	1
122	0.09	Male	Hispanic	16	4	0	0	0	1	13.2	91.2	0	5	LOS > 2 days		Not septic	1	0	Medical	No shock	Not Onc	Survivor	0
123	1.24	Female	Hispanic	13.1	1	1	0	0	0	11.7	71.6	0	2	LOS < 2 days		Not septic	1	0	Medical	No shock	Not Onc	Survivor	1
126	1.96	Male	White	17.3	4	0	0	0	1	13	77.5	0	1	LOS < 2 days		Not septic	7	0	Post-op/surgical	No shock	Not Onc	Survivor	1
127	0.58	Male	Black	14.1	2	0	1	0	0	10.8	79.2	1	17	LOS > 2 days	10.6	Septic	11	1	Medical	Yes shock	Not Onc	Survivor	1
128	5.1	Female	White	12.5	1	1	0	0	0	13	79.8	0	1	LOS < 2 days		Not septic	6	0	Post-op/surgical	No shock	Not Onc	Survivor	1
129	3.75	Female	Other	13.4	2	0	1	0	0	12.7	74.7	0	3	LOS > 2 days		Not septic	2	0	Post-op/surgical	No shock	Not Onc	Survivor	1
130	0.99	Male	Black	15.8	4	0	0	0	1	11.9	79.2	0	3	LOS > 2 days		Not septic	7	0	Post-op/surgical	No shock	Not Onc	Survivor	1
131	5	Female	Other	14.3	2	0	1	0	0	10.7	69.3	1	64	LOS > 2 days	5.8	Not septic	6	0	Medical	No shock	Not Onc	Survivor	0
135	8	Male	Other	12.3	1	1	0	0	0	4.7	81.4	1	2	LOS < 2 days	4.2	Not septic	12	3	Medical	Yes shock	Yes Onc	Survivor	0
137	13.44	Female	Black	12	1	1	0	0	0	13.8	83.5	0	1	LOS < 2 days		Not septic	2	0	Medical	No shock	Not Onc	Survivor	1
138	12.46	Male	White	13.8	2	0	1	0	0	14.4	89.7	0	1	LOS < 2 days		Not septic	10	0	Medical	No shock	Not Onc	Survivor	0
140	0.14	Female	Black	15.1	3	0	0	1	0	7.9	85.5	1	11	LOS > 2 days		Not septic	1	0	Medical	No shock	Not Onc	Survivor	0
141	0.93	Female	White	25.5	4	0	0	0	1	12.1	66.9	0	4	LOS > 2 days		Not septic	2	0	Post-op/surgical	No shock	Not Onc	Survivor	1
144	0.49	Male	Hispanic	14.4	3	0	0	1	0	15.6	86.6	0	2	LOS < 2 days		Not septic	1	0	Medical	No shock	Not Onc	Survivor	1
145	1.46	Male	Hispanic	14.5	3	0	0	1	0	17	82.1	0	40	LOS > 2 days		Not septic	1	0	Medical	No shock	Not Onc	Survivor	1
147	1.63	Male	Hispanic	13.9	2	0	1	0	0	12.9	79.6	0	4	LOS > 2 days		Not septic	2	0	Post-op/surgical	No shock	Not Onc	Survivor	1
150	1.55	Female	Black	14.8	3	0	0	1	0	11.8	74	0	3	LOS > 2 days		Not septic	10	6	Medical	No shock	Not Onc	Survivor	1
153	0.88	Male	Black	16.7	4	0	0	0	1	11	84.3	0	14	LOS > 2 days		Not septic	1	5	Medical	No shock	Not Onc	Survivor	1
154	14.85	Male	White	13.9	2	0	1	0	0	11.9	79.4	1	4	LOS > 2 days		Not septic	2	0	Post-op/surgical	No shock	Not Onc	Survivor	1
156	3.72	Female	White	14.6	3	0	0	1	0	10.9	84	1	14	LOS > 2 days		Not septic	2	0	Post-op/surgical	No shock	Not Onc	Survivor	1
157	2.91	Female	Other	18.1	4	0	0	0	1	14	78.2	0	4	LOS > 2 days		Not septic	4	0	Post-op/surgical	No shock	Not Onc	Survivor	1
158	1.09	Male	White	14.1	2	0	1	0	0	11.3	79.4	0	13	LOS > 2 days		Not septic	2	0	Post-op/surgical	No shock	Not Onc	Survivor	0
159	17.28	Male	Hispanic	14.6	3	0	0	1	0	11.9	80.5	1	4	LOS > 2 days		Not septic	4	0	Medical	No shock	Not Onc	Survivor	1
160	11.96	Female	White	12.4	1	1	0	0	0	14.6	92.6	0	1	LOS < 2 days		Not septic	10	0	Medical	No shock	Not Onc	Survivor	0
161	12.75	Female	White	13	1	1	0	0	0	9.5	88.1	1	4	LOS > 2 days		Not septic	7	6	Post-op/surgical	No shock	Not Onc	Survivor	1
162	9.24	Male	White	15.8	4	0	0	0	1	8.6	81.9	1	4	LOS > 2 days		Not septic	10	0	Medical	No shock	Not Onc	Survivor	1
163	1.02	Male	Hispanic	16.2	4	0	0	0	1	12.9	80.8	0	22	LOS > 2 days		Not septic	9	0	Medical	No shock	Not Onc	Survivor	1
166	0.77	Female	White	13.8	2	0	1	0	0	14	83.2	0	14	LOS > 2 days	80.13	Not septic	1	0	Medical	No shock	Not Onc	Non-survivor	0
168	18.86	Male	White	20	4	0	0	0	1	8.6	94.2	1	5	LOS > 2 days		Not septic	4	5	Medical	No shock	Not Onc	Survivor	1
169	0.17	Female	Hispanic	15.9	4	0	0	0	1	12.8	88.9	0	2	LOS < 2 days	1.1	Septic	11	3	Medical	No shock	Yes Onc	Survivor	0
170	0.27	Female	White	14.1	2	0	1	0	0	14	88.2	0	6	LOS > 2 days		Not septic	2	0	Post-op/surgical	No shock	Not Onc	Survivor	1
172	0.33	Male	White	13.4	2	0	1	0	0	12.5	78.3	0	3	LOS > 2 days		Not septic	2	0	Post-op/surgical	No shock	Not Onc	Survivor	1
176	2.99	Female	Hispanic	16.3	4	0	0	0	1	14.4	86.4	0	8	LOS > 2 days		Not septic	1	0	Medical	No shock	Not Onc	Survivor	1
177	14.35	Male	White	15	3	0	0	1	0	16.2	80.3	0	2	LOS < 2 days		Not septic	10	0	Medical	No shock	Not Onc	Survivor	0
178	0.24	Male	White	14.7	3	0	0	1	0	10.3	81.3	1	11	LOS > 2 days		Not septic	2	0	Post-op/surgical	No shock	Not Onc	Survivor	0
179	3.58	Male	Other	15.3	3	0	0	1	0	10.9	82.2	1	9	LOS > 2 days	4.72	Not septic	6	0	Medical	No shock	Not Onc	Survivor	0
181	3.48	Male	White	15	3	0	0	1	0	12.2	82.1	0	6	LOS > 2 days		Not septic	2	0	Post-op/surgical	No shock	Not Onc	Survivor	1
182	15.06	Male	White	12.9	1	1	0	0	0	8.8	86.4	1	1	LOS < 2 days		Not septic	8	0	Post-op/surgical	No shock	Not Onc	Survivor	1
184	13	Female	White	19.3	4	0	0	0	1	12.9	93.1	0	1	LOS > 2 days	13.4	Septic	12	5	Medical	Yes shock	Not Onc	Non-survivor	1
186	0.01	Female	White	18.6	4	0	0	0	1	20	92.9	0	5	LOS > 2 days		Not septic	2	0	Post-op/surgical	No shock	Not Onc	Survivor	1
187	17.42	Male	White	15.6	3	0	0	1	1	11.6	90.5	1	1	LOS < 2 days		Not septic	8	0	Post-op/surgical	No shock	Not Onc	Survivor	1
189	0.33	Female	White	14.1	2	0	1	0	0	16.2	79.8	0	4	LOS > 2 days		Not septic	2	0	Post-op/surgical	No shock	Not Onc	Survivor	1
190	1.99	Male	Hispanic	15.7	3	0	0	1	1	10.2	79.7	1	1	LOS < 2 days		Not septic	2	0	Post-op/surgical	No shock	Not Onc	Survivor	1
191	6.69	Male	Hispanic	14.4	3	0	0	1	0	10.5	77.5	1	4	LOS > 2 days		Not septic	2	0	Post-op/surgical	No shock	Not Onc	Survivor	1
192	14	Male	Hispanic	18	4	0	0	0	1	8.2	91	1	1	LOS < 2 days	4	Septic	11	3	Medical	Yes shock	Yes Onc	Survivor	1
195	1.19	Male	Hispanic	16.2	4	0	0	0	1	13.6	90.8	0	22	LOS > 2 days		Not septic	4	0	Post-op/surgical	No shock	Not Onc	Survivor	1
198	3.93	Male	Hispanic	12.9	1	1	0	0	0	11.3	78.2	0	3	LOS > 2 days		Not septic	7	0	Post-op/surgical	No shock	Not Onc	Survivor	1
200	17.21	Male	White	13.5	2	0	1	0	0	13.4	83.5	0	2	LOS < 2 days		Not septic	7	0	Post-op/surgical	No shock	Not Onc	Survivor	1
201	4.69	Female	Hispanic	20.1	4	0	0	0	1	13.5	82.3	0	4	LOS > 2 days	3.56	Not septic	10	2	Medical	No shock	Not Onc	Survivor	1
202	2.24	Male	Hispanic	15.7	3	0	0	1	1	10.9	86.5	1	1	LOS < 2 days		Not septic	6	10	Medical	No shock	Not Onc	Survivor	0
203	13	Male	Black	13.4	2	0	1	0	0	10.6	70.3	1	1	LOS < 2 days	0.9	Septic	11	5	Post-op/surgical	No shock	Not Onc	Survivor	1
204	0.61	Male	Hispanic	14.5	3	0	0	1	0	10.2	75.7	1	1	LOS < 2 days		Not septic	4	5	Medical	No shock	Not Onc	Survivor	0
205	3.05	Female	Hispanic	19.1	4	0	0	0	1	3.3	88.4	1	1	LOS < 2 days		Not septic	3	0	Medical	No shock	Yes Onc	Survivor	0
206	0.78	Female	Hispanic	12.6	1	1	0	0	0	10.5	76.7	1	2	LOS < 2 days		Not septic	1	0	Medical	No shock	Not Onc	Survivor	0
207	1.15	Male	Hispanic	14.9	3	0	0	1	0	10.1	74.9	1	9	LOS > 2 days	0.76	Not septic	1	0	Medical	No shock	Not Onc	Survivor	0
208	8	Female	Other	16.3	4	0	0	0	1	10.8	96.3	1	4	LOS > 2 days	4.6	Septic	11	3	Medical	Yes shock	Yes Onc	Survivor	1
210	11	Female	White	13.7	2	0	1	0	0	14.2	80.9	0	16	LOS > 2 days	78.3	Not septic	11	2	Post-op/surgical	Yes shock	Not Onc	Non-survivor	1
212	3.15	Male	Black	12.6	1	1	0	0	0	12.6	78.8	0	1	LOS < 2 days		Not septic	9	6	Medical	No shock	Not Onc	Survivor	1
213	9.92	Female	Hispanic	15.9	4	0	0	0	1	12.2	75.3	0	6	LOS > 2 days		Not septic	2	3	Medical	No shock	Yes Onc	Survivor	0
215	11.18	Male	Black	13.7	2	0	1	0	0	13.1	79.3	0	3	LOS > 2 days		Not septic	6	3	Medical	No shock	Yes Onc	Survivor	1
216	16.59	Male	White	14	2	0	1	0	0	13.6	84.9	0	1	LOS < 2 days		Not septic	6	0	Medical	No shock	Not Onc	Survivor	1
217	0.16	Female	Black	14.8	3	0	0	1	0	10.8	91.7	1	1	LOS < 2 days		Not septic	7	0	Post-op/surgical	No shock	Not Onc	Survivor	1
218	16.4	Female	White	14.1	2	0	1	0	0	7.3	89.5	1	2	LOS < 2 days		Not septic	5	0	Medical	No shock	Not Onc	Survivor	0
219	0.99	Male	White	13	1	1	0	0	0	12.7	79	0	1	LOS < 2 days	0.32	Not septic	10	0	Post-op/surgical	No shock	Not Onc	Survivor	1
221	1.75	Male	Other	17.7	4	0	0	0	1	12.8	83.1	0	8	LOS > 2 days	0.32	Not septic	7	1	Post-op/surgical	No shock	Not Onc	Survivor	1
222	14.55	Male	White	14.4	3	0	0	1	0	11.9	85	1	1	LOS < 2 days	0.32	Not septic	8	0	Post-op/surgical	No shock	Not Onc	Survivor	1
223	3.48	Male	Black	15.3	3	0	0	1	0	15.7	72.8	0	16	LOS > 2 days	2.36	Not septic	2	0	Post-op/surgical	No shock	Not Onc	Survivor	1
226	2.72	Female	White	12.7	1	1	0	0	0	13.4	79	0	2	LOS < 2 days	0.14	Not septic	6	0	Medical	No shock	Not Onc	Survivor	1
227	3.08	Male	Hispanic	16.1	4	0	0	0	1	19.9	82.4	0	5	LOS > 2 days	0.0292	Not septic	2	10	Post-op/surgical	No shock	Not Onc	Survivor	1
231	18.04	Female	White	13.2	1	1	0	0	0	6.3	83.1	1	1	LOS < 2 days		Not septic	3	1	Medical	No shock	Not Onc	Survivor	1
232	5.78	Male	White	14.2	2	0	1	0	0	12.4	75.8	0	20	LOS > 2 days	5.11	Not septic	2	0	Post-op/surgical	No shock	Not Onc	Survivor	0
234	1.5	Female	Hispanic	15.2	3	0	0	1	0	13.4	70.6	0	30	LOS > 2 days		Not septic	1	0	Medical	No shock	Not Onc	Survivor	1
235	0.44	Male	Black	12.8	1	1	0	0	0	11.1	74.1	0	6	LOS > 2 days	3.71	Not septic	10	6	Medical	No shock	Not Onc	Survivor	0
236	12.27	Male	Hispanic	17.1	4	0	0	0	1	15.9	87.4	0	21	LOS > 2 days	0.95	Not septic	4	0	Medical	No shock	Not Onc	Survivor	1
237	19.2	Male	Black	15.3	3	0	0	1	0	10.8	85.6	1	1	LOS > 2 days	0.15	Not septic	5	0	Post-op/surgical	No shock	Not Onc	Survivor	1
238	8.63	Female	Hispanic	15	3	0	0	1	0	13.9	98.2	0	3	LOS > 2 days	5.83	Not septic	3	0	Medical	No shock	Yes Onc	Survivor	1
239	11.5	Male	Hispanic	13.2	1	1	0	0	0	12.5	78.7	0	6	LOS > 2 days		Not septic	6	0	Post-op/surgical	No shock	Not Onc	Survivor	1
240	4.86	Female	White	14.6	3	0	0	1	0	12.2	79.8	0	1	LOS < 2 days	0.94	Not septic	7	0	Medical	No shock	Not Onc	Survivor	1
241	0.69	Male	White	23.4	4	0	0	0	1	13.5	103.2	0	5	LOS > 2 days		Not septic	4	0	Medical	No shock	Not Onc	Survivor	0
242	14.85	Male	White	13.4	2	0	1	0	0	8.7	73.8	1	4	LOS > 2 days		Not septic	3	0	Medical	No shock	Not Onc	Survivor	0
243	6.64	Male	Hispanic	12.8	1	1	0	0	0	8.1	79.2	1	4	LOS > 2 days	0.3	Not septic	5	0	Post-op/surgical	No shock	Not Onc	Survivor	1
244	0.09	Male	White	16.2	4	0	0	0	1	11.7	90.5	1	16	LOS > 2 days	4.02	Not septic	6	0	Medical	No shock	Not Onc	Survivor	0
245	12.33	Male	Other	12.5	1	1	0	0	0	13.8	74.6	0	1	LOS < 2 days	0.94	Not septic	6	3	Post-op/surgical	No shock	Yes Onc	Survivor	1
246	18.3	Male	White	13.8	2	0	1	0	0	12.5	87.9	1	1	LOS < 2 days	0.12	Not septic	2	0	Post-op/surgical	No shock	Not Onc	Survivor	1
247	0.41	Female	Hispanic	14.1	2	0	1	0	0	12.7	80.4	0	7	LOS > 2 days	1.4	Not septic	2	0	Post-op/surgical	No shock	Not Onc	Survivor	1
248	0.36	Female	White	16.9	4	0	0	0	1	10.8	76	1	6	LOS > 2 days	1.27	Not septic	2	0	Post-op/surgical	No shock	Not Onc	Survivor	1
249	7.61	Female	Hispanic	12.3	1	1	0	0	0	11.9	78.8	0	9	LOS > 2 days		Not septic	7	0	Post-op/surgical	No shock	Not Onc	Survivor	0
251	2.84	Female	Hispanic	15.5	3	0	0	1	1	13.7	83	0	5	LOS > 2 days	1.13	Not septic	2	0	Post-op/surgical	No shock	Not Onc	Survivor	1
252	0.22	Male	Black	15	3	0	0	1	0	7.7	80.2	1	3	LOS > 2 days	1.18	Not septic	2	11	Medical	No shock	Not Onc	Survivor	0
253	0.08	Male	White	14.4	3	0	0	1	0	9.3	93.1	1	57	LOS > 2 days	17.7	Septic	11	11	Medical	Yes shock	Not Onc	Survivor	0
254	8.75	Female	White	13.9	2	0	1	0	0	10.4	83.8	1	1	LOS < 2 days	0.13	Not septic	8	0	Post-op/surgical	No shock	Not Onc	Survivor	1
258	0.12	Female	Hispanic	15.3	3	0	0	1	0	11.2	91.3	0	10	LOS > 2 days	0.92	Not septic	1	0	Medical	No shock	Not Onc	Survivor	1
260	5.44	Female	White	19.4	4	0	0	0	1	9.5	73.5	1	2	LOS < 2 days		Not septic	6	3	Medical	No shock	Yes Onc	Survivor	1
262	2.13	Male	White	13	1	1	0	0	0	13	76.8	0	1	LOS < 2 days	0.12	Not septic	7	0	Post-op/surgical	No shock	Not Onc	Survivor	1
263	14.92	Female	White	13.4	2	0	1	0	0	13.4	81.6	0	3	LOS > 2 days	0.15	Not septic	8	1	Post-op/surgical	No shock	Not Onc	Survivor	1
264	3.7	Male	White	12.4	1	1	0	0	0	12	85.1	0	1	LOS < 2 days	0.99	Not septic	9	0	Medical	No shock	Not Onc	Survivor	1
266	6.01	Male	Black	14.7	3	0	0	1	0	10.9	79	1	1	LOS < 2 days	0.33	Not septic	7	0	Post-op/surgical	No shock	Not Onc	Survivor	1
267	13	Male	White	15	3	0	0	1	0	10.7	79.4	1	5	LOS > 2 days	4.6	Septic	11	3	Medical	Yes shock	Yes Onc	Survivor	1
268	0.89	Female	Hispanic	12.9	1	1	0	0	0	11.4	79.2	0	2	LOS < 2 days	3.29	Not septic	1	6	Medical	No shock	Not Onc	Survivor	0
269	15.55	Female	White	12.5	1	1	0	0	0	7.9	93.8	1	1	LOS < 2 days	12	Not septic	8	0	Post-op/surgical	No shock	Not Onc	Survivor	1
270	6.31	Female	Other	14	2	0	1	0	0	11.9	84.1	0	14	LOS > 2 days	2.64	Not septic	2	0	Post-op/surgical	No shock	Not Onc	Survivor	1
271	19.27	Male	White	12.2	1	1	0	0	0	10.3	95	1	1	LOS < 2 days	38	Not septic	3	0	Medical	No shock	Yes Onc	Survivor	1
272	0.62	Female	Black	15.5	3	0	0	1	1	9.2	69.8	1	11	LOS > 2 days	15.1	Not septic	1	0	Medical	No shock	Not Onc	Survivor	0
273	9.02	Male	Other	21.7	4	0	0	0	1	2.8	96.6	1	1	LOS < 2 days	0.85	Not septic	3	0	Medical	No shock	Yes Onc	Survivor	0
274	5.61	Female	White	15.2	3	0	0	1	0	11.7	81	0	10	LOS > 2 days	1.47	Not septic	2	0	Post-op/surgical	No shock	Not Onc	Survivor	1
277	12.71	Female	Hispanic	12.9	1	1	0	0	0	13.1	89.1	0	6	LOS > 2 days	0.23	Not septic	2	0	Post-op/surgical	No shock	Not Onc	Survivor	1
278	0.41	Male	Other	13.9	2	0	1	0	0	15.8	82.1	0	25	LOS > 2 days	2.62	Not septic	2	0	Post-op/surgical	No shock	Not Onc	Survivor	1
279	12.94	Female	White	14.5	3	0	0	1	0	12.5	81.3	0	15	LOS > 2 days	3.11	Not septic	1	0	Medical	No shock	Not Onc	Survivor	0
281	13.32	Female	Hispanic	15.3	3	0	0	1	0	12.4	81.9	0	3	LOS > 2 days	0.91	Not septic	6	0	Medical	No shock	Not Onc	Survivor	0
282	0.5	Female	Black	15.2	3	0	0	1	0	9.2	88.8	1	3	LOS > 2 days	3.86	Not septic	5	0	Medical	No shock	Not Onc	Survivor	1
283	3.75	Female	Black	15.8	4	0	0	0	1	11.1	72.7	0	66	LOS > 2 days		Not septic	1	0	Medical	No shock	Not Onc	Survivor	1
284	6.3	Male	White	15.4	3	0	0	1	1	11.9	75.3	0	2	LOS < 2 days	0.58	Not septic	5	0	Post-op/surgical	No shock	Not Onc	Survivor	1
285	2.44	Male	White	11.9	1	1	0	0	0	13.9	78.1	0	1	LOS < 2 days	1.59	Not septic	2	0	Post-op/surgical	No shock	Not Onc	Survivor	1
286	4.27	Male	Black	13.8	2	0	1	0	0	13.1	76.8	0	6	LOS > 2 days	14.06	Not septic	9	0	Post-op/surgical	No shock	Not Onc	Survivor	0
287	1.01	Female	White	14.1	2	0	1	0	0	11.7	89.2	0	2	LOS < 2 days	1.3	Not septic	2	0	Post-op/surgical	No shock	Not Onc	Survivor	1
288	15.26	Female	Hispanic	15.4	3	0	0	1	1	12.4	94.3	0	15	LOS > 2 days	4.42	Not septic	1	0	Medical	No shock	Not Onc	Survivor	1
289	2.54	Female	White	14.3	2	0	1	0	0	13.1	79.3	0	3	LOS > 2 days	1.62	Not septic	2	0	Post-op/surgical	No shock	Not Onc	Survivor	1
290	0.64	Male	Black	14.6	3	0	0	1	0	10.7	72.7	1	1	LOS < 2 days	0.84	Not septic	1	0	Medical	No shock	Not Onc	Survivor	0
292	9.13	Female	Hispanic	12.5	1	1	0	0	0	13.9	86.3	0	2	LOS < 2 days	1.17	Not septic	2	0	Post-op/surgical	No shock	Not Onc	Survivor	1
294	15.64	Male	Other	14.6	3	0	0	1	0	10.3	85.1	1	1	LOS > 2 days	4.47	Not septic	4	5	Medical	No shock	Not Onc	Non-survivor	1
295	12.88	Female	White	13.6	2	0	1	0	0	10.8	91.1	1	2	LOS < 2 days	0.11	Not septic	8	0	Post-op/surgical	No shock	Not Onc	Survivor	1
296	18.08	Male	White	13.1	1	1	0	0	0	15.9	93.4	0	2	LOS < 2 days	3.3	Not septic	5	0	Medical	No shock	Not Onc	Survivor	0
297	17.45	Male	White	13.3	1	1	0	0	0	16.9	88.3	0	1	LOS < 2 days	0.78	Not septic	2	0	Medical	No shock	Not Onc	Survivor	0
298	0.3	Female	White	13.6	2	0	1	0	0	15.2	85.4	0	6	LOS > 2 days	1.68	Not septic	2	0	Post-op/surgical	No shock	Not Onc	Survivor	1
300	14.78	Male	Hispanic	12.2	1	1	0	0	0	14.4	85.9	0	1	LOS < 2 days	1	Not septic	10	0	Medical	No shock	Not Onc	Survivor	1
301	14.52	Male	Hispanic	12.6	1	1	0	0	0	14.5	86.3	0	2	LOS < 2 days	0.13	Not septic	9	0	Post-op/surgical	No shock	Not Onc	Survivor	1
302	16.08	Female	White	13.2	1	1	0	0	0	10.9	82.2	1	3	LOS > 2 days	1.58	Not septic	2	0	Post-op/surgical	No shock	Not Onc	Survivor	1
303	9.27	Male	Black	16.9	4	0	0	0	1	11.3	77.3	1	4	LOS > 2 days	2.99	Not septic	1	2	Medical	No shock	Not Onc	Survivor	1
304	0.78	Female	White	13.9	2	0	1	0	0	15	85.1	0	8	LOS > 2 days	1.26	Not septic	2	0	Post-op/surgical	No shock	Not Onc	Survivor	1
306	1.3	Male	Hispanic	18.8	4	0	0	0	1	11.9	85.8	0	4	LOS > 2 days	6.1	Septic	11	3	Medical	Yes shock	Yes Onc	Survivor	1
307	17	Female	Other	17.2	4	0	0	0	1	9.1	94.7	1	25	LOS > 2 days	4.9	Septic	11	3	Medical	Yes shock	Yes Onc	Survivor	1
308	2.61	Male	Black	14.7	3	0	0	1	0	11.8	70.8	0	7	LOS > 2 days		Not septic	1	0	Post-op/surgical	No shock	Not Onc	Survivor	0
309	11.55	Male	Hispanic	13.2	1	1	0	0	0	12.1	78.4	0	18	LOS > 2 days	15.1	Not septic	6	0	Medical	No shock	Not Onc	Survivor	0
310	0.94	Female	Hispanic	15.3	3	0	0	1	0	13.6	83.3	0	9	LOS > 2 days	3.09	Not septic	2	0	Post-op/surgical	No shock	Not Onc	Survivor	1
311	13.26	Male	Black	17.7	4	0	0	0	1	10.8	67.7	1	2	LOS < 2 days	0.87	Not septic	3	0	Medical	No shock	Yes Onc	Survivor	1
312	3.27	Male	Other	15.1	3	0	0	1	0	13.6	81.8	0	5	LOS > 2 days		Not septic	1	2	Post-op/surgical	No shock	Not Onc	Survivor	0
314	8	Female	Black	12.5	1	1	0	0	0	13.4	76.3	0	43	LOS > 2 days		Not septic	6	1	Post-op/surgical	No shock	Not Onc	Survivor	1
316	15.39	Male	Hispanic	12.5	1	1	0	0	0	13.6	82.3	0	4	LOS > 2 days	0.79	Not septic	2	0	Post-op/surgical	No shock	Not Onc	Survivor	1
318	0.72	Female	White	14.6	3	0	0	1	0	9.3	74.4	1	5	LOS > 2 days	0.78	Not septic	1	0	Medical	No shock	Not Onc	Survivor	1
319	3	Male	Black	12.8	1	1	0	0	0	12	83.6	0	7	LOS > 2 days		Not septic	1	0	Post-op/surgical	No shock	Not Onc	Survivor	1
322	3.05	Male	Black	15.3	3	0	0	1	0	11.6	87.6	0	1	LOS < 2 days	0.98	Not septic	6	3	Medical	No shock	Yes Onc	Survivor	1
323	0.09	Male	Hispanic	14.2	2	0	1	0	0	8.7	90.4	1	1	LOS < 2 days	0.89	Not septic	6	0	Medical	No shock	Not Onc	Survivor	0
324	2.61	Female	Hispanic	13.7	2	0	1	0	0	11.2	78.9	0	2	LOS < 2 days	0.17	Not septic	1	0	Medical	No shock	Not Onc	Survivor	1
325	12.87	Male	Hispanic	19.5	4	0	0	0	1	11.5	75.5	1	6	LOS > 2 days	0.79	Not septic	2	0	Medical	No shock	Not Onc	Survivor	1
327	2.01	Female	Hispanic	13.1	1	1	0	0	0	10.2	81.5	1	3	LOS > 2 days	0.84	Not septic	2	0	Post-op/surgical	No shock	Not Onc	Survivor	1
330	12.25	Male	White	12.7	1	1	0	0	0	12.4	75.9	0	4	LOS > 2 days	0.03	Not septic	6	0	Post-op/surgical	No shock	Not Onc	Survivor	1
331	16	Female	White	15.4	3	0	0	1	1	14.7	76.1	0	3	LOS > 2 days	5.3	Septic	11	3	Medical	Yes shock	Yes Onc	Survivor	1
332	0.97	Male	White	14.5	3	0	0	1	0	11.8	80.5	0	4	LOS > 2 days		Not septic	3	0	Medical	No shock	Yes Onc	Survivor	1
335	0.41	Female	Hispanic	11.1	1	1	0	0	0	10.6	77.3	1	2	LOS < 2 days	3.38	Not septic	1	6	Medical	No shock	Not Onc	Survivor	0
336	2.92	Male	Hispanic	13.6	2	0	1	0	0	13.6	84.5	0	19	LOS > 2 days	8.24	Not septic	2	0	Post-op/surgical	No shock	Not Onc	Survivor	1
337	13.21	Female	Black	12.9	1	1	0	0	0	12.2	85.3	0	1	LOS < 2 days		Not septic	6	0	Medical	No shock	Not Onc	Survivor	1
339	14.97	Male	White	13.8	2	0	1	0	0	12.8	81.8	0	3	LOS > 2 days	2.04	Not septic	2	0	Post-op/surgical	No shock	Not Onc	Survivor	1
341	4.58	Female	White	12.2	1	1	0	0	0	9.7	80.1	1	4	LOS > 2 days	1.05	Not septic	7	0	Post-op/surgical	No shock	Not Onc	Survivor	1
342	0.66	Male	Other	15.1	3	0	0	1	0	11.1	79.6	0	13	LOS > 2 days		Not septic	7	0	Post-op/surgical	No shock	Not Onc	Survivor	1
343	0.17	Male	Other	15.4	3	0	0	1	1	11.2	79.8	1	3	LOS > 2 days	0.39	Not septic	7	0	Medical	No shock	Not Onc	Survivor	0
344	12	Female	White	14.9	3	0	0	1	0	16	85.4	0	49	LOS > 2 days	44.3	Not septic	12	2	Medical	Yes shock	Not Onc	Survivor	0
345	0.33	Female	Other	12.3	1	1	0	0	0	8.6	75	1	2	LOS < 2 days	1.1	Septic	11	11	Medical	Yes shock	Not Onc	Survivor	1
347	18.43	Female	White	14.3	2	0	1	0	0	12.7	87.3	0	19	LOS > 2 days		Not septic	7	0	Post-op/surgical	No shock	Not Onc	Survivor	1
350	5.95	Female	Hispanic	12.6	1	1	0	0	0	13.1	82.5	0	2	LOS > 2 days	0.78	Not septic	6	0	Medical	No shock	Not Onc	Survivor	1
351	5.07	Female	White	12.7	1	1	0	0	0	10.8	81.7	1	2	LOS > 2 days	0.13	Not septic	8	0	Post-op/surgical	No shock	Not Onc	Survivor	1
353	13.84	Female	White	14.1	2	0	1	0	0	14.2	86.4	0	2	LOS > 2 days	0.17	Not septic	1	0	Medical	No shock	Not Onc	Survivor	0
356	7.02	Female	Other	15.8	4	0	0	0	1	11.9	82.9	0	3	LOS > 2 days	0.45	Not septic	4	0	Post-op/surgical	No shock	Not Onc	Survivor	1
357	9.38	Male	Hispanic	13.1	1	1	0	0	0	10.4	79.9	1	5	LOS > 2 days	1.75	Not septic	2	0	Post-op/surgical	No shock	Not Onc	Survivor	1
358	1.87	Female	White	14.9	3	0	0	1	0	10.6	74.4	1	4	LOS > 2 days		Not septic	2	0	Post-op/surgical	No shock	Not Onc	Survivor	1
359	7.76	Male	Black	14.1	2	0	1	0	0	10.5	79.1	1	3	LOS > 2 days		Not septic	6	3	Post-op/surgical	No shock	Yes Onc	Survivor	1
360	0.42	Male	Black	14.5	3	0	0	1	0	12.6	78.3	0	33	LOS < 2 days		Not septic	2	0	Post-op/surgical	No shock	Not Onc	Survivor	0
361	4.13	Female	White	12.6	1	1	0	0	0	10.3	89	1	4	LOS > 2 days	0.59	Not septic	2	0	Post-op/surgical	No shock	Not Onc	Survivor	1
362	10.39	Male	White	13.5	2	0	1	0	0	10.9	77.7	1	4	LOS > 2 days	1.17	Not septic	2	0	Post-op/surgical	No shock	Not Onc	Survivor	1
363	12.31	Male	White	14.5	3	0	0	1	0	10.7	81.7	1	3	LOS > 2 days	1.17	Not septic	2	0	Post-op/surgical	No shock	Not Onc	Survivor	1
364	2.11	Male	Hispanic	14.5	3	0	0	1	0	12.6	78.3	0	1	LOS < 2 days		Not septic	1	0	Medical	No shock	Not Onc	Survivor	0
366	2	Female	Black	17.5	4	0	0	0	1	8.2	78.7	1	23	LOS > 2 days	3.9	Not septic	6	3	Medical	No shock	Yes Onc	Survivor	1
368	13.54	Female	Black	17	4	0	0	0	1	11.2	73.4	1	33	LOS > 2 days		Not septic	1	3	Medical	No shock	Yes Onc	Survivor	0
369	4.39	Male	Hispanic	13.3	1	1	0	0	0	15.8	77.2	0	3	LOS > 2 days		Not septic	5	0	Post-op/surgical	No shock	Not Onc	Survivor	0
370	13.63	Male	Black	13	1	1	0	0	0	8.3	80	1	2	LOS > 2 days	0.72	Not septic	1	0	Medical	No shock	Not Onc	Non-survivor	1
372	15.7	Female	Hispanic	15.1	3	0	0	1	0	10.5	85.4	1	1	LOS < 2 days	3.91	Not septic	6	3	Medical	No shock	Not Onc	Survivor	1
373	3.95	Male	White	12.6	1	1	0	0	0	14.3	85.3	0	1	LOS < 2 days	0.91	Not septic	2	0	Post-op/surgical	No shock	Not Onc	Survivor	1
377	2.88	Male	Hispanic	15.2	3	0	0	1	0	15.4	80.5	0	13	LOS > 2 days	2.5	Not septic	2	0	Medical	No shock	Not Onc	Survivor	1
378	9.54	Male	Hispanic	14.5	3	0	0	1	0	11.7	82.2	0	3	LOS > 2 days	4.72	Not septic	5	4	Medical	No shock	Not Onc	Non-survivor	0
379	0.37	Female	Hispanic	15.3	3	0	0	1	1	14.2	93.2	0	8	LOS > 2 days	0.37	Not septic	2	0	Post-op/surgical	No shock	Not Onc	Survivor	1
381	13.71	Male	Hispanic	14.3	2	0	1	0	0	10.6	80.7	1	4	LOS > 2 days	0.35	Not septic	7	0	Post-op/surgical	No shock	Not Onc	Survivor	1
382	16.41	Male	White	15.1	3	0	0	1	0	10.4	80.2	1	2	LOS < 2 days	3.24	Not septic	1	0	Medical	No shock	Not Onc	Survivor	1
384	15.61	Female	White	15.4	3	0	0	1	1	7.3	80.8	1	3	LOS > 2 days	6.95	Not septic	5	6	Post-op/surgical	No shock	Not Onc	Survivor	1
385	10	Male	Hispanic	17.6	4	0	0	0	1	10.7	90.5	1	2	LOS < 2 days	1.1	Septic	11	11	Medical	Yes shock	Not Onc	Survivor	0
386	7.5	Male	White	14.1	2	0	1	0	0	12.4	73.5	0	3	LOS > 2 days	0.35	Not septic	2	0	Post-op/surgical	No shock	Not Onc	Survivor	1
387	0.2	Female	White	13.7	2	0	1	0	0	13.8	82.3	0	12	LOS > 2 days	1.04	Not septic	2	0	Post-op/surgical	No shock	Not Onc	Survivor	1
388	1.55	Female	White	13.3	1	1	0	0	0	9.3	72.6	1	1	LOS < 2 days	0.12	Not septic	7	0	Post-op/surgical	No shock	Not Onc	Survivor	1
389	15.13	Female	Black	18.9	4	0	0	0	1	3.6	60.6	1	2	LOS < 2 days	0.96	Not septic	3	0	Medical	No shock	Not Onc	Survivor	0
391	14.28	Female	White	14.4	3	0	0	1	0	7.5	79.6	1	9	LOS > 2 days		Not septic	4	10	Medical	No shock	Not Onc	Survivor	1
392	9.12	Male	Black	14.3	2	0	1	0	0	12.5	76.6	0	5	LOS > 2 days	0.78	Not septic	7	0	Post-op/surgical	No shock	Not Onc	Survivor	1
393	0.37	Male	White	13.9	2	0	1	0	0	14	84.8	0	9	LOS > 2 days	2.79	Not septic	2	0	Post-op/surgical	No shock	Not Onc	Survivor	1
394	0.98	Female	Black	13.9	2	0	1	0	0	10.6	87.7	1	2	LOS > 2 days		Not septic	6	0	Medical	No shock	Not Onc	Non-survivor	1
395	20.17	Male	Hispanic	19.3	4	0	0	0	1	10.9	99.4	1	3	LOS > 2 days	2.8	Not septic	6	3	Medical	No shock	Not Onc	Non-survivor	1
397	0.94	Female	White	14.1	2	0	1	0	0	13.6	84.8	0	3	LOS > 2 days	1.43	Not septic	2	0	Post-op/surgical	No shock	Not Onc	Survivor	1
398	12.96	Male	White	12.3	1	1	0	0	0	14.1	82	0	1	LOS < 2 days	0.11	Not septic	2	0	Post-op/surgical	No shock	Not Onc	Survivor	1
400	8.63	Female	White	13.2	1	1	0	0	0	12.8	87.6	0	1	LOS < 2 days	0.11	Not septic	7	0	Post-op/surgical	No shock	Not Onc	Survivor	1
401	0.32	Female	White	14.9	3	0	0	1	0	14.4	87.3	0	24	LOS > 2 days		Not septic	2	0	Post-op/surgical	No shock	Not Onc	Survivor	1
402	19.98	Male	Hispanic	12.8	1	1	0	0	0	10.8	85.6	1	2	LOS < 2 days		Not septic	5	0	Medical	No shock	Not Onc	Survivor	1
403	2.67	Female	Hispanic	13.5	2	0	1	0	0	13	80.2	0	3	LOS > 2 days	1.22	Not septic	2	0	Post-op/surgical	No shock	Not Onc	Survivor	1
404	11.54	Female	Hispanic	15	3	0	0	1	0	13.7	81	0	3	LOS > 2 days	0.86	Not septic	1	0	Medical	No shock	Not Onc	Survivor	1
405	21.59	Male	White	15.6	3	0	0	1	1	14.5	78.4	0	2	LOS < 2 days	2.99	Not septic	6	0	Medical	No shock	Not Onc	Survivor	0
406	0.9	Male	Black	17.6	4	0	0	0	1	8.6	79.7	1	35	LOS > 2 days	0.76	Not septic	6	3	Medical	No shock	Not Onc	Non-survivor	1
407	1.48	Female	White	14.7	3	0	0	1	0	10.8	80.7	1	3	LOS > 2 days	2.33	Not septic	2	0	Post-op/surgical	No shock	Not Onc	Survivor	1
408	7.54	Male	Hispanic	13	1	1	0	0	0	10.9	82	1	4	LOS > 2 days	0.03	Not septic	6	0	Post-op/surgical	No shock	Not Onc	Survivor	1
410	15.65	Female	Black	15.7	3	0	0	1	1	14.5	77.8	0	2	LOS < 2 days	0.18	Not septic	10	0	Medical	No shock	Not Onc	Survivor	0
412	3.97	Male	White	13.9	2	0	1	0	0	14.9	85.4	0	51	LOS > 2 days	1.8	Not septic	2	0	Post-op/surgical	No shock	Not Onc	Survivor	1
413	18.33	Female	Hispanic	14.5	3	0	0	1	0	11.4	101.2	1	3	LOS > 2 days	0.46	Not septic	4	0	Post-op/surgical	No shock	Not Onc	Survivor	1
414	9.47	Female	White	12.6	1	1	0	0	0	13.8	82.3	0	5	LOS > 2 days	1.42	Not septic	4	0	Medical	No shock	Not Onc	Survivor	0
415	12.33	Male	White	13.1	1	1	0	0	0	14.5	78.4	0	1	LOS < 2 days	0.96	Not septic	6	0	Medical	No shock	Not Onc	Survivor	1
416	9	Male	Black	17.5	4	0	0	0	1	6.4	69.4	1	3	LOS > 2 days	0.9	Septic	11	4	Medical	Yes shock	Not Onc	Survivor	0
418	16.06	Female	Black	14.3	2	0	1	0	0	11	81.8	1	2	LOS < 2 days	0.78	Not septic	7	0	Medical	No shock	Not Onc	Survivor	0
419	4.24	Male	Hispanic	13.2	1	1	0	0	0	13.3	78.2	0	4	LOS > 2 days	1.08	Not septic	2	0	Post-op/surgical	No shock	Not Onc	Survivor	1
420	0.04	Male	White	16.9	4	0	0	0	1	9.9	95.2	1	3	LOS > 2 days	2	Not septic	10	11	Medical	No shock	Not Onc	Survivor	1
421	1.16	Female	Hispanic	13.1	1	1	0	0	0	8.7	78.1	1	1	LOS < 2 days	3.86	Not septic	6	0	Medical	No shock	Not Onc	Survivor	0
422	13.65	Male	Hispanic	14.6	3	0	0	1	0	9.8	99.1	1	10	LOS > 2 days	0.21	Not septic	1	2	Medical	No shock	Not Onc	Survivor	1
423	18.11	Male	Hispanic	13.6	2	0	1	0	0	14.6	87.1	0	2	LOS < 2 days		Not septic	2	0	Post-op/surgical	No shock	Not Onc	Survivor	0
424	3.15	Female	Black	13.6	2	0	1	0	0	13.3	79	0	1	LOS < 2 days	1.27	Not septic	6	0	Medical	No shock	Not Onc	Survivor	1
425	0.51	Male	White	14.8	3	0	0	1	0	13.4	82.6	0	28	LOS > 2 days		Not septic	2	0	Post-op/surgical	No shock	Not Onc	Survivor	1
426	6.99	Female	Hispanic	14.5	3	0	0	1	0	10.5	80.4	1	5	LOS > 2 days	1.3	Not septic	2	0	Post-op/surgical	No shock	Not Onc	Survivor	1
427	0.65	Female	Hispanic	13.2	1	1	0	0	0	12.3	81.8	0	1	LOS < 2 days	0.18	Not septic	1	0	Medical	No shock	Not Onc	Survivor	1
428	11.9	Male	White	16.5	4	0	0	0	1	12.5	89.2	0	8	LOS > 2 days	0.92	Not septic	8	1	Post-op/surgical	No shock	Not Onc	Survivor	1
429	2.64	Female	Hispanic	14	2	0	1	0	0	11.2	76.9	0	2	LOS < 2 days	1.2	Not septic	1	0	Medical	No shock	Not Onc	Survivor	1
430	11.68	Female	Black	16.5	4	0	0	0	1	11.5	78.9	0	2	LOS < 2 days	0.07	Not septic	7	0	Post-op/surgical	No shock	Not Onc	Survivor	1
433	5.3	Male	White	13.6	2	0	1	0	0	15	78.7	0	1	LOS < 2 days	0.03	Not septic	2	0	Post-op/surgical	No shock	Not Onc	Survivor	1
435	1.01	Male	Hispanic	12.7	1	1	0	0	0	12.8	89.1	0	4	LOS > 2 days	1.11	Not septic	2	0	Post-op/surgical	No shock	Not Onc	Survivor	1
436	0.14	Female	Hispanic	14.9	3	0	0	1	0	8.4	87.1	1	1	LOS < 2 days	1.14	Not septic	2	0	Medical	No shock	Not Onc	Survivor	0
437	0.04	Male	Black	17.6	4	0	0	0	1	14.3	114.6	0	2	LOS < 2 days	4.4	Septic	11	1	Medical	Yes shock	Not Onc	Survivor	0
438	13.96	Male	White	12.7	1	1	0	0	0	11.9	88.1	1	4	LOS > 2 days	1.4	Not septic	2	0	Post-op/surgical	No shock	Not Onc	Survivor	1
440	15.9	Female	White	13.2	1	1	0	0	0	11.3	89.4	1	4	LOS > 2 days	0.86	Not septic	1	6	Medical	No shock	Not Onc	Survivor	0
443	0.13	Male	Hispanic	13.7	2	0	1	0	0	10.7	78.5	1	3	LOS > 2 days	0.82	Not septic	5	0	Medical	No shock	Not Onc	Survivor	1
446	1.19	Male	Black	13	1	1	0	0	0	12	75.3	0	2	LOS < 2 days	0.77	Not septic	1	0	Medical	No shock	Not Onc	Survivor	0
448	14.05	Female	White	12.8	1	1	0	0	0	12.3	85.7	0	4	LOS > 2 days		Not septic	6	0	Medical	No shock	Not Onc	Survivor	0
452	1.92	Male	Other	13.6	2	0	1	0	0	11.3	82	0	4	LOS > 2 days	2.83	Not septic	1	0	Medical	No shock	Not Onc	Survivor	0
454	2	Male	White	13.3	1	1	0	0	0	9.8	82.2	1	2	LOS < 2 days	0.9	Not septic	12	5	Post-op/surgical	Yes shock	Not Onc	Survivor	1
456	3.92	Female	Black	14	2	0	1	0	0	12	75.8	0	1	LOS < 2 days	0.02	Not septic	7	0	Post-op/surgical	No shock	Not Onc	Survivor	1
458	0.38	Female	White	14.2	2	0	1	0	0	13.3	80.9	0	5	LOS > 2 days	1.42	Not septic	2	0	Post-op/surgical	No shock	Not Onc	Survivor	1
460	10.93	Female	Black	16.5	4	0	0	0	1	6.9	79.8	1	16	LOS > 2 days		Not septic	2	0	Medical	No shock	Not Onc	Survivor	1
461	0.42	Male	Hispanic	14.9	3	0	0	1	0	14.4	85.3	0	5	LOS > 2 days	1.12	Not septic	2	0	Post-op/surgical	No shock	Not Onc	Survivor	1
465	1.19	Male	White	12.4	1	1	0	0	0	12.7	79	0	1	LOS < 2 days	4.02	Not septic	6	0	Medical	No shock	Not Onc	Survivor	0
466	14	Female	Hispanic	16.2	4	0	0	0	1	6.3	82.2	1	3	LOS > 2 days	0.8	Septic	11	5	Medical	Yes shock	Not Onc	Survivor	1
470	1.05	Male	Black	14.5	3	0	0	1	0	12.3	85.3	0	2	LOS < 2 days	0.76	Not septic	6	2	Medical	No shock	Not Onc	Survivor	1
471	6.96	Female	Other	15.6	3	0	0	1	1	11	77	1	2	LOS < 2 days	6.58	Not septic	6	0	Medical	No shock	Not Onc	Survivor	1
472	15.6	Female	Black	14.9	3	0	0	1	0	4.9	85.1	1	2	LOS < 2 days	1.5	Not septic	4	10	Medical	No shock	Not Onc	Survivor	0
473	2.63	Male	White	14.9	3	0	0	1	0	14.6	82.8	0	7	LOS > 2 days	1.63	Not septic	2	0	Post-op/surgical	No shock	Not Onc	Survivor	1
476	4.64	Male	White	16.4	4	0	0	0	1	12.7	76.6	0	6	LOS > 2 days	1.64	Not septic	2	0	Post-op/surgical	No shock	Not Onc	Survivor	1
478	8.02	Female	Hispanic	16.9	4	0	0	0	1	13	94.7	0	1	LOS > 2 days	0.86	Not septic	6	3	Medical	No shock	Not Onc	Non-survivor	0
481	15.12	Female	Black	16.4	4	0	0	0	1	11.3	88.8	1	3	LOS > 2 days	9.18	Not septic	5	0	Post-op/surgical	No shock	Not Onc	Survivor	1
482	0.17	Male	Other	19.7	4	0	0	0	1	6.3	80.6	1	3	LOS > 2 days	0.77	Not septic	9	6	Medical	No shock	Not Onc	Survivor	1
483	10	Male	Black	18.6	4	0	0	0	1	8.4	71.9	1	3	LOS > 2 days	0.8	Septic	12	4	Medical	Yes shock	Not Onc	Survivor	1
485	7.18	Male	Black	13.3	1	1	0	0	0	11.3	79.5	0	5	LOS > 2 days	1.4	Not septic	1	0	Medical	No shock	Not Onc	Survivor	0
486	1.64	Male	Hispanic	14.3	2	0	1	0	0	12.1	72.4	0	2	LOS < 2 days	4.66	Not septic	7	0	Post-op/surgical	No shock	Not Onc	Survivor	1
488	0.25	Male	Black	14	2	0	1	0	0	10.9	79.9	1	3	LOS > 2 days	1.1	Not septic	6	0	Medical	No shock	Not Onc	Survivor	0
492	5.29	Male	Hispanic	13.6	2	0	1	0	0	12.5	85.8	0	3	LOS > 2 days	4.13	Not septic	1	0	Medical	No shock	Not Onc	Survivor	1
493	0.15	Female	Black	17.1	4	0	0	0	1	7	88.2	1	4	LOS > 2 days	47.03	Not septic	12	2	Medical	No shock	Not Onc	Non-survivor	0
494	5.87	Male	Hispanic	14.2	2	0	1	0	0	11.4	75.2	1	3	LOS > 2 days		Not septic	6	0	Medical	No shock	Yes Onc	Survivor	1
509	2.39	Female	White	12.4	1	1	0	0	0	14.9	82.7	0	1	LOS < 2 days	0.4	Not septic	1	0	Medical	No shock	Not Onc	Survivor	0
514	17.13	Male	Black	14.7	3	0	0	1	0	12.3	79.1	1	5	LOS > 2 days	1.03	Not septic	1	0	Medical	No shock	Not Onc	Survivor	1
517	17	Female	White	12.7	1	1	0	0	0	10.7	95.8	1	8	LOS > 2 days	0.5	Septic	11	1	Medical	Yes shock	Not Onc	Survivor	0
519	6	Male	Black	18.3	4	0	0	0	1	7.3	80.9	1	8	LOS > 2 days	5.4	Septic	11	3	Medical	Yes shock	Yes Onc	Survivor	0
520	0.08	Female	White	15	3	0	0	1	0	13.2	86.9	0	21	LOS > 2 days	1	Septic	11	2	Medical	No shock	Not Onc	Survivor	0
521	0.97	Female	Hispanic	14.4	3	0	0	1	0	12.3	84.9	0	19	LOS > 2 days		Not septic	3	5	Post-op/surgical	No shock	Yes Onc	Survivor	1
525	0.76	Male	Black	15.7	3	0	0	1	1	10.3	81.9	1	30	LOS > 2 days		Not septic	5	0	Post-op/surgical	No shock	Not Onc	Survivor	1
526	2.68	Female	Black	13.9	2	0	1	0	0	14.7	84.3	0	7	LOS > 2 days	4.67	Not septic	2	0	Post-op/surgical	No shock	Not Onc	Survivor	1
529	1	Female	White	14.2	2	0	1	0	0	10.2	82.8	1	11	LOS > 2 days	5.6	Septic	11	3	Medical	Yes shock	Not Onc	Non-survivor	1
530	3	Male	White	15.3	3	0	0	1	0	9.8	76.4	1	1	LOS < 2 days	0.8	Septic	11	3	Medical	Yes shock	Yes Onc	Survivor	1
541	14.88	Female	Black	12.6	1	1	0	0	0	13.8	99.2	0	23	LOS > 2 days	0.85	Not septic	6	0	Medical	No shock	Not Onc	Survivor	0
542	4.5	Male	White	20.3	4	0	0	0	1	9.7	71.9	1	15	LOS > 2 days		Not septic	1	5	Medical	No shock	Not Onc	Survivor	1
544	0.92	Female	Hispanic	16.9	4	0	0	0	1	10	76.1	1	25	LOS > 2 days	3.3	Septic	11	1	Medical	Yes shock	Not Onc	Survivor	1
550	2.89	Male	Hispanic	17.6	4	0	0	0	1	13.4	74.7	0	2	LOS < 2 days	0.28	Not septic	5	0	Post-op/surgical	No shock	Not Onc	Survivor	1
551	0.02	Male	Hispanic	17	4	0	0	0	1	17.3	96.9	0	2	LOS < 2 days	11.5	Septic	11	0	Medical	No shock	Not Onc	Survivor	0
554	0.92	Female	Other	14.8	3	0	0	1	0	11.8	76.2	0	24	LOS > 2 days	1.5	Not septic	2	10	Medical	Yes shock	Not Onc	Survivor	1
555	0.08	Female	Other	14.4	3	0	0	1	0	9	91.7	1	1	LOS < 2 days	1.5	Septic	11	0	Medical	No shock	Not Onc	Survivor	1
557	15.43	Male	Hispanic	12.9	1	1	0	0	0	12.4	86.7	1	4	LOS > 2 days		Not septic	6	0	Medical	No shock	Not Onc	Survivor	0
558	13	Male	Hispanic	16.4	4	0	0	0	1	9.9	79.5	1	2	LOS < 2 days	1.5	Septic	11	3	Medical	Yes shock	Yes Onc	Survivor	1
559	19.23	Female	Black	17.5	4	0	0	0	1	9.1	87.5	1	6	LOS > 2 days	3.03	Not septic	6	3	Medical	No shock	Yes Onc	Survivor	0
567	0.47	Male	White	13.7	2	0	1	0	0	10.8	82	1	2	LOS < 2 days	1.61	Not septic	2	0	Post-op/surgical	No shock	Not Onc	Survivor	1
570	13	Female	White	19.9	4	0	0	0	1	10.4	80.3	1	1	LOS < 2 days	0.9	Septic	11	5	Medical	Yes shock	Not Onc	Survivor	1
573	3.93	Male	Black	14.7	3	0	0	1	0	13.9	85.1	0	3	LOS > 2 days	1.14	Not septic	10	2	Medical	No shock	Not Onc	Survivor	1
575	0.62	Female	Black	15	3	0	0	1	0	9	70.1	1	7	LOS > 2 days	0.78	Not septic	1	6	Medical	No shock	Not Onc	Survivor	0
577	4.13	Female	Other	14.9	3	0	0	1	0	10.1	78.5	1	4	LOS > 2 days	0.73	Not septic	1	0	Medical	No shock	Not Onc	Survivor	0
579	17.4	Female	Black	14.6	3	0	0	1	0	13.7	79.2	0	3	LOS > 2 days	0.76	Not septic	1	0	Medical	No shock	Not Onc	Survivor	0
582	14	Female	Black	17.1	4	0	0	0	1	8.6	78.3	1	10	LOS > 2 days	6.2	Septic	11	0	Medical	Yes shock	Not Onc	Survivor	1
583	16	Male	White	13.7	2	0	1	0	0	12.3	90	1	12	LOS > 2 days	5	Septic	11	1	Medical	Yes shock	Not Onc	Survivor	0
585	2.94	Male	White	16	4	0	0	0	1	11.8	78.3	0	13	LOS > 2 days		Not septic	5	2	Post-op/surgical	No shock	Not Onc	Survivor	1
586	8	Female	Hispanic	13.5	2	0	1	0	0	12.8	92	0	71	LOS > 2 days	5.6	Septic	11	1	Medical	Yes shock	Not Onc	Survivor	1
587	18.43	Male	White	13	1	1	0	0	0	14.3	79.3	0	1	LOS < 2 days		Not septic	6	0	Medical	No shock	Not Onc	Survivor	0
589	0.64	Female	Hispanic	13.9	2	0	1	0	0	13.8	76.4	0	7	LOS > 2 days	1.49	Not septic	2	0	Post-op/surgical	No shock	Not Onc	Survivor	1
594	3.66	Female	White	16.8	4	0	0	0	1	13.3	89.9	0	11	LOS > 2 days	3.33	Not septic	1	6	Medical	No shock	Not Onc	Survivor	1
610	1.79	Female	White	12.3	1	1	0	0	0	14.5	83.6	0	3	LOS > 2 days	3.52	Not septic	1	6	Medical	No shock	Not Onc	Survivor	1
611	18	Male	White	18.5	4	0	0	0	1	9.6	90.4	1	6	LOS > 2 days	1	Septic	11	3	Medical	Yes shock	Yes Onc	Survivor	1
612	17.01	Male	Hispanic	12.5	1	1	0	0	0	13.2	82	0	2	LOS < 2 days	3.61	Not septic	1	0	Medical	No shock	Not Onc	Survivor	1
620	12.47	Female	White	13.3	1	1	0	0	0	11	81.6	1	1	LOS < 2 days	2.42	Not septic	6	0	Post-op/surgical	No shock	Not Onc	Survivor	1
625	0.91	Male	White	15.7	3	0	0	1	1	4.9	87.3	1	5	LOS > 2 days	0.8	Not septic	5	0	Medical	No shock	Not Onc	Survivor	1
627	15	Female	White	13.2	1	1	0	0	0	14	80	0	1	LOS < 2 days		Not septic	4	0	Medical	No shock	Not Onc	Survivor	1
630	12.91	Female	Hispanic	23.3	4	0	0	0	1	9.2	65.6	1	4	LOS > 2 days	1	Not septic	3	0	Medical	No shock	Yes Onc	Survivor	1
633	5.36	Male	Hispanic	13.1	1	1	0	0	0	13	87.7	0	11	LOS > 2 days	5.98	Not septic	6	0	Medical	No shock	Not Onc	Survivor	1
645	13	Male	Hispanic	21.4	4	0	0	0	1	10.1	88.3	1	76	LOS > 2 days	5.2	Septic	11	2	Medical	Yes shock	Not Onc	Non-survivor	1
646	3.65	Female	Hispanic	13.6	2	0	1	0	0	12.5	80.7	0	2	LOS < 2 days		Not septic	2	0	Post-op/surgical	No shock	Not Onc	Survivor	0
651	0.66	Male	White	17.3	4	0	0	0	1	4.5	70.8	1	2	LOS < 2 days	1.02	Not septic	3	0	Medical	No shock	Yes Onc	Survivor	1
669	5.71	Male	White	12.4	1	1	0	0	0	11.2	79.2	1	6	LOS > 2 days	9.19	Not septic	12	1	Medical	No shock	Not Onc	Non-survivor	1
683	2.68	Male	White	13.8	2	0	1	0	0	15.3	81	0	16	LOS > 2 days		Not septic	2	0	Post-op/surgical	No shock	Not Onc	Survivor	0
687	3.86	Male	Black	13.2	1	1	0	0	0	14.6	82.1	0	10	LOS > 2 days	2.33	Not septic	2	0	Post-op/surgical	No shock	Not Onc	Survivor	1
689	17	Female	White	16.5	4	0	0	0	1	12.1	87.9	0	1	LOS < 2 days	1	Septic	11	3	Medical	Yes shock	Yes Onc	Survivor	1
690	5.18	Female	Hispanic	13.5	2	0	1	0	0	12.1	82.6	0	2	LOS < 2 days	0.25	Not septic	2	0	Post-op/surgical	No shock	Not Onc	Survivor	1
695	4.24	Female	Hispanic	22.4	4	0	0	0	1	11.8	83.2	0	9	LOS > 2 days	0.98	Not septic	1	2	Medical	No shock	Not Onc	Survivor	1
706	3.87	Male	Hispanic	14.4	3	0	0	1	0	11.4	76.5	0	5	LOS > 2 days	0.6	Not septic	1	0	Medical	No shock	Not Onc	Survivor	1
716	18	Female	White	21.1	4	0	0	0	1	12.9	82	0	18	LOS > 2 days	5.8	Septic	11	4	Medical	Yes shock	Not Onc	Survivor	1
721	0.04	Female	White	15.6	3	0	0	1	1	9.8	95.2	1	24	LOS > 2 days	1.4	Septic	11	2	Medical	No shock	Not Onc	Survivor	0
744	14	Female	Hispanic	16.2	4	0	0	0	1	9	70.9	1	5	LOS > 2 days	1.6	Septic	11	4	Medical	Yes shock	Not Onc	Survivor	0
745	2.92	Male	White	16	4	0	0	0	1	10.2	78	1	6	LOS > 2 days	0.42	Not septic	5	0	Post-op/surgical	No shock	Not Onc	Survivor	1
749	0.17	Male	Other	14.6	3	0	0	1	0	12.6	82.3	0	37	LOS > 2 days	3.2	Not septic	6	3	Post-op/surgical	No shock	Not Onc	Non-survivor	1
756	18	Male	Hispanic	13.3	1	1	0	0	0	11.9	91.4	1	4	LOS > 2 days	1.4	Septic	11	3	Medical	Yes shock	Yes Onc	Survivor	1
757	8	Male	Black	14.6	3	0	0	1	0	12	77.7	0	2	LOS < 2 days	1.4	Septic	12	5	Medical	Yes shock	Not Onc	Survivor	1
758	4.25	Male	White	14.3	2	0	1	0	0	9.1	81.7	1	1	LOS < 2 days	0.18	Not septic	6	0	Post-op/surgical	No shock	Not Onc	Survivor	1
765	16.97	Female	White	12.6	1	1	0	0	0	13	87.4	0	1	LOS < 2 days	0.34	Not septic	2	0	Post-op/surgical	No shock	Not Onc	Survivor	1
768	0.04	Female	Hispanic	19.5	4	0	0	0	1	12.3	110.8	0	272	LOS > 2 days	96.1	Septic	11	9	Medical	Yes shock	Not Onc	Survivor	0
769	1.92	Male	Black	14.3	2	0	1	0	0	11.1	75.6	0	2	LOS < 2 days	3.71	Not septic	1	0	Medical	No shock	Not Onc	Survivor	0
774	3.27	Male	Hispanic	15.5	3	0	0	1	1	10.6	64.3	1	1	LOS < 2 days	0.21	Not septic	1	0	Medical	No shock	Not Onc	Survivor	1
777	6.34	Male	Black	22.4	4	0	0	0	1	8.3	67.4	1	3	LOS > 2 days	3.07	Not septic	1	3	Medical	No shock	Yes Onc	Survivor	1
778	11.8	Female	White	25.6	4	0	0	0	1	10.5	77.9	1	57	LOS > 2 days	5.24	Not septic	2	5	Medical	No shock	Not Onc	Survivor	0
781	3.06	Male	White	15.8	4	0	0	0	1	9.1	74.5	1	13	LOS > 2 days		Not septic	5	0	Post-op/surgical	No shock	Not Onc	Survivor	1
785	13	Male	White	14.4	3	0	0	1	0	10.8	100.1	1	65	LOS > 2 days	58.9	Septic	12	2	Medical	Yes shock	Not Onc	Survivor	0
791	13	Female	White	12.8	1	1	0	0	0	10.7	86.1	1	1	LOS < 2 days	0.95	Not septic	8	0	Post-op/surgical	No shock	Not Onc	Survivor	0
793	17	Male	Other	14.2	2	0	1	0	0	10.4	79.3	1	8	LOS > 2 days	21.8	Not septic	10	2	Medical	No shock	Not Onc	Survivor	0
794	0.33	Female	White	14.5	3	0	0	1	0	12.8	84.8	0	15	LOS > 2 days	3.9	Not septic	12	10	Post-op/surgical	Yes shock	Not Onc	Survivor	1
795	5.17	Female	Hispanic	14	2	0	1	0	0	11.2	78.5	1	2	LOS < 2 days	0.25	Not septic	1	0	Medical	No shock	Not Onc	Survivor	1
797	2.18	Male	White	24	4	0	0	0	1	9.8	72.3	1	1	LOS < 2 days	0.12	Not septic	8	0	Post-op/surgical	No shock	Not Onc	Survivor	1
804	2.81	Female	White	13.5	2	0	1	0	0	11.8	80	0	6	LOS > 2 days	1.15	Not septic	2	0	Post-op/surgical	No shock	Not Onc	Survivor	1
809	2.3	Female	Hispanic	14.2	2	0	1	0	0	12.9	78.4	0	3	LOS > 2 days	1.62	Not septic	2	0	Post-op/surgical	No shock	Not Onc	Survivor	1
816	1.81	Female	Hispanic	14.2	2	0	1	0	0	10.2	77.8	1	6	LOS > 2 days		Not septic	1	2	Medical	No shock	Not Onc	Survivor	1
822	16.4	Female	Hispanic	14.9	3	0	0	1	0	16.4	84.9	0	4	LOS > 2 days		Not septic	3	0	Medical	No shock	Yes Onc	Survivor	1
830	15.94	Male	Hispanic	13.6	2	0	1	0	0	14.4	83	0	19	LOS > 2 days		Not septic	6	0	Post-op/surgical	No shock	Not Onc	Survivor	0
831	5	Male	White	17.2	4	0	0	0	1	9.9	88.8	1	9	LOS > 2 days	4.9	Septic	11	3	Medical	Yes shock	Yes Onc	Survivor	1
833	3.01	Male	Hispanic	14.2	2	0	1	0	0	12.8	78.2	0	5	LOS > 2 days	1.11	Not septic	6	0	Post-op/surgical	No shock	Not Onc	Survivor	1
834	15.76	Male	Black	13.4	2	0	1	0	0	13.7	80.8	0	1	LOS < 2 days	0.76	Not septic	10	0	Medical	No shock	Not Onc	Survivor	1
843	0.08	Female	Hispanic	17.4	4	0	0	0	1	12.2	96.6	0	5	LOS > 2 days	1.2	Not septic	10	11	Medical	No shock	Not Onc	Survivor	0
847	17.44	Female	White	13.4	2	0	1	0	0	13.4	90.4	0	2	LOS < 2 days		Not septic	6	0	Medical	No shock	Not Onc	Survivor	1
853	0.08	Female	Hispanic	15.1	3	0	0	1	0	10.1	83	1	5	LOS > 2 days	1.2	Septic	11	1	Medical	No shock	Not Onc	Survivor	1
854	4	Female	Hispanic	21.5	4	0	0	0	1	8	78.8	1	2	LOS < 2 days	2.8	Septic	11	5	Medical	Yes shock	Not Onc	Survivor	1
857	7	Female	White	15.8	4	0	0	0	1	9.3	90.7	1	6	LOS > 2 days	5.5	Septic	11	1	Medical	No shock	Not Onc	Survivor	0
872	0.88	Female	White	14.8	3	0	0	1	0	11.2	72.5	0	2	LOS < 2 days	0.02	Not septic	7	0	Post-op/surgical	No shock	Not Onc	Survivor	1
873	12.46	Male	Other	12.3	1	1	0	0	0	13.7	81.7	0	2	LOS < 2 days	0.92	Not septic	1	0	Medical	No shock	Not Onc	Survivor	1
874	5.26	Male	Other	13.1	1	1	0	0	0	10.5	79.9	1	14	LOS > 2 days	0.78	Not septic	6	0	Medical	No shock	Not Onc	Survivor	0
875	9	Male	Hispanic	12.5	1	1	0	0	0	7.7	75.6	1	35	LOS > 2 days	6.3	Septic	11	3	Medical	Yes shock	Yes Onc	Survivor	0
878	0.1	Male	Hispanic	14.1	2	0	1	0	0	10.5	88.7	1	8	LOS > 2 days	0.21	Not septic	1	0	Medical	No shock	Not Onc	Survivor	1
880	9.44	Female	Hispanic	18.1	4	0	0	0	1	11.1	92.2	1	3	LOS > 2 days	2.17	Not septic	5	0	Post-op/surgical	No shock	Not Onc	Survivor	1
882	15.6	Male	Hispanic	14	2	0	1	0	0	13	85.4	0	1	LOS < 2 days	0.43	Not septic	4	0	Post-op/surgical	No shock	Not Onc	Survivor	1
883	2.63	Female	White	13.1	1	1	0	0	0	13.7	90	0	3	LOS > 2 days	7.89	Not septic	2	0	Post-op/surgical	No shock	Not Onc	Survivor	1
886	14	Female	Other	21.8	4	0	0	0	1	6.9	91.3	1	91	LOS > 2 days	1	Septic	11	1	Medical	No shock	Not Onc	Survivor	1
888	2.69	Male	Hispanic	14.4	3	0	0	1	0	10.4	73.7	1	5	LOS > 2 days	0.18	Not septic	1	0	Medical	No shock	Not Onc	Survivor	1
894	3.76	Male	White	14.8	3	0	0	1	0	13.9	83.4	0	10	LOS > 2 days	0.44	Not septic	2	0	Post-op/surgical	No shock	Not Onc	Survivor	1
896	0.75	Male	Hispanic	14.1	2	0	1	0	0	9.7	85.6	1	469	LOS > 2 days	0.3	Septic	1	11	Post-op/surgical	No shock	Not Onc	Survivor	0
898	8.17	Male	Hispanic	14.9	3	0	0	1	0	10.7	78.4	1	4	LOS > 2 days	1.15	Not septic	2	0	Post-op/surgical	No shock	Not Onc	Survivor	1
912	2.6	Female	White	14.1	2	0	1	0	0	12.3	84.4	0	1	LOS < 2 days		Not septic	6	0	Medical	No shock	Not Onc	Survivor	0
914	0.74	Female	Black	14.3	2	0	1	0	0	10.7	81.8	1	2	LOS < 2 days	3.42	Not septic	6	0	Medical	No shock	Not Onc	Survivor	0
916	12.04	Female	Other	13.1	1	1	0	0	0	12.3	81.4	0	2	LOS < 2 days	0.6	Not septic	1	0	Medical	No shock	Not Onc	Survivor	0
918	1.9	Male	White	15.4	3	0	0	1	1	14.8	82.4	0	1	LOS > 2 days		Not septic	10	1	Medical	No shock	Not Onc	Non-survivor	0
919	11.17	Male	White	13.3	1	1	0	0	0	13.5	82.1	0	3	LOS > 2 days	0.13	Not septic	5	0	Post-op/surgical	No shock	Not Onc	Survivor	1
921	8.59	Female	White	12.8	1	1	0	0	0	11.8	85.7	0	2	LOS < 2 days	0.82	Not septic	1	0	Medical	No shock	Not Onc	Survivor	0
922	12.65	Male	White	14	2	0	1	0	0	11.7	85	1	3	LOS > 2 days		Not septic	2	0	Post-op/surgical	No shock	Not Onc	Survivor	1
923	0.42	Female	Black	14.4	3	0	0	1	0	9.9	86.4	1	21	LOS > 2 days	4.2	Septic	11	1	Medical	Yes shock	Not Onc	Survivor	1
926	7.09	Female	Hispanic	13.3	1	1	0	0	0	12.7	84.2	0	4	LOS > 2 days		Not septic	8	0	Medical	No shock	Not Onc	Survivor	0
927	14.99	Male	Hispanic	12.5	1	1	0	0	0	13.9	85.5	0	36	LOS > 2 days		Not septic	9	0	Medical	No shock	Not Onc	Survivor	1
929	4.13	Female	White	12.6	1	1	0	0	0	11.4	81.4	0	2	LOS < 2 days	0.14	Not septic	2	0	Post-op/surgical	No shock	Not Onc	Survivor	1
930	11.51	Female	Hispanic	12.4	1	1	0	0	0	7.8	76.9	1	2	LOS < 2 days	0.27	Not septic	3	0	Post-op/surgical	No shock	Yes Onc	Survivor	1
945	3.43	Male	White	15.1	3	0	0	1	0	13.5	77.8	0	1	LOS < 2 days	0.35	Not septic	2	0	Post-op/surgical	No shock	Not Onc	Survivor	1
948	17	Male	White	16.2	4	0	0	0	1	11.3	86.5	1	4	LOS > 2 days	6.7	Septic	11	3	Medical	Yes shock	Yes Onc	Survivor	1
953	8	Male	Black	13.4	2	0	1	0	0	10.9	84.9	1	4	LOS > 2 days	10.4	Septic	11	5	Post-op/surgical	No shock	Not Onc	Survivor	1
959	14	Male	Hispanic	20.4	4	0	0	0	1	9.5	90.2	1	5	LOS > 2 days	4.5	Septic	11	3	Medical	Yes shock	Yes Onc	Survivor	0
961	5.76	Male	Hispanic	14.8	3	0	0	1	0	10.5	99.6	1	7	LOS > 2 days	1.06	Not septic	3	0	Medical	No shock	Yes Onc	Survivor	1
962	3.14	Female	Hispanic	14.3	2	0	1	0	0	9.5	69.9	1	4	LOS > 2 days	1.03	Not septic	1	0	Medical	No shock	Not Onc	Survivor	1
963	11.93	Male	Other	13.8	2	0	1	0	0	9.5	77.6	1	3	LOS > 2 days	0.3	Not septic	4	0	Post-op/surgical	No shock	Not Onc	Survivor	1
964	2.34	Female	Hispanic	13.8	2	0	1	0	0	15.4	87.5	0	3	LOS > 2 days	0.2	Not septic	10	0	Medical	No shock	Not Onc	Survivor	1
965	14.78	Male	White	14.8	3	0	0	1	0	13.1	87.1	0	3	LOS > 2 days	0.87	Not septic	4	0	Post-op/surgical	No shock	Not Onc	Survivor	1
966	2.73	Male	White	13.6	2	0	1	0	0	14.2	83.1	0	3	LOS > 2 days	0.45	Not septic	10	2	Medical	No shock	Not Onc	Survivor	1
967	1.28	Male	Hispanic	12.6	1	1	0	0	0	11.9	79.4	0	8	LOS > 2 days	0.16	Not septic	1	0	Medical	No shock	Not Onc	Survivor	1
968	16.47	Male	White	12.6	1	1	0	0	0	13.3	81.5	0	2	LOS < 2 days	0.82	Not septic	2	0	Medical	No shock	Not Onc	Survivor	0
970	17	Male	White	27.7	4	0	0	0	1	9.1	111.4	1	69	LOS > 2 days	5.8	Septic	11	3	Medical	Yes shock	Not Onc	Non-survivor	1
971	0.68	Female	White	13.2	1	1	0	0	0	13.6	86.4	0	4	LOS > 2 days	1.79	Not septic	2	0	Post-op/surgical	No shock	Not Onc	Survivor	1
986	8	Female	Black	15.5	3	0	0	1	1	9.8	74.3	1	95	LOS > 2 days	14.6	Septic	11	3	Medical	Yes shock	Yes Onc	Survivor	0
988	4	Female	Other	16.8	4	0	0	0	1	8	60.3	1	42	LOS > 2 days	0.3	Septic	11	0	Medical	No shock	Not Onc	Survivor	1
997	1.56	Female	White	16.7	4	0	0	0	1	8.1	73.2	1	6	LOS > 2 days	3.52	Not septic	10	0	Medical	No shock	Not Onc	Survivor	1
1009	16	Female	Hispanic	13.6	2	0	1	0	0	7.8	81.9	1	13	LOS > 2 days	4.2	Septic	11	3	Medical	Yes shock	Yes Onc	Survivor	1
1038	18	Male	White	14.7	3	0	0	1	0	10.8	84.5	1	19	LOS > 2 days	30.4	Septic	11	0	Medical	Yes shock	Not Onc	Survivor	0
1041	5	Female	Hispanic	13.5	2	0	1	0	0	12.2	82.3	0	3	LOS > 2 days	3.9	Septic	11	3	Medical	Yes shock	Yes Onc	Survivor	1
1049	3.06	Male	Hispanic	18.2	4	0	0	0	1	10.2	78.8	1	1	LOS < 2 days	0.18	Not septic	1	0	Medical	No shock	Not Onc	Survivor	1
1053	0.88	Male	Hispanic	13.8	2	0	1	0	0	8.9	79.2	1	10	LOS > 2 days		Not septic	1	0	Medical	No shock	Not Onc	Survivor	1
1054	3.15	Female	White	13.6	2	0	1	0	0	11.7	92.6	0	2	LOS < 2 days	1.18	Not septic	6	0	Medical	No shock	Not Onc	Survivor	0
1058	1.27	Female	Other	14.7	3	0	0	1	0	21.1	85.2	0	2	LOS < 2 days	0.19	Not septic	1	2	Medical	No shock	Not Onc	Survivor	0
1062	12	Female	White	18.2	4	0	0	0	1	9.3	90.3	1	24	LOS > 2 days	5.3	Septic	11	1	Medical	No shock	Not Onc	Survivor	1
1093	0.85	Male	Other	15	3	0	0	1	0	14	77.2	0	33	LOS > 2 days	0.21	Not septic	1	0	Medical	No shock	Not Onc	Survivor	0
1096	1.28	Female	White	22.2	4	0	0	0	1	3	57	1	1	LOS < 2 days		Not septic	3	0	Medical	No shock	Not Onc	Survivor	0
1118	9.39	Male	White	13.8	2	0	1	0	0	12.2	88.4	0	2	LOS < 2 days	0.94	Not septic	1	0	Medical	No shock	Not Onc	Survivor	1
1119	14.95	Male	Other	21.8	4	0	0	0	1	10.1	86	1	1	LOS < 2 days	0.77	Not septic	3	0	Medical	No shock	Yes Onc	Survivor	1
1120	11.43	Male	Other	14.2	2	0	1	0	0	13.4	77.3	0	23	LOS > 2 days		Not septic	2	0	Medical	No shock	Not Onc	Survivor	1
1121	16.73	Female	Black	14.4	3	0	0	1	0	6.5	81.5	1	2	LOS < 2 days		Not septic	4	0	Medical	No shock	Not Onc	Survivor	0
1122	1.5	Female	White	13.8	2	0	1	0	0	9.9	81	1	13	LOS > 2 days		Not septic	2	0	Medical	No shock	Not Onc	Survivor	0
1123	3.46	Female	White	19.8	4	0	0	0	1	12.9	79.2	0	3	LOS > 2 days		Not septic	5	0	Post-op/surgical	No shock	Not Onc	Survivor	1
1124	1.5	Female	Black	13.2	1	1	0	0	0	14.5	86.2	0	2	LOS < 2 days		Not septic	5	1	Medical	No shock	Not Onc	Survivor	0
1125	0.29	Female	White	13.4	2	0	1	0	0	11.6	80.4	0	8	LOS > 2 days	1.48	Not septic	2	0	Post-op/surgical	No shock	Not Onc	Survivor	1
1127	0.39	Male	White	11.5	1	1	0	0	0	13.1	82.5	0	1	LOS < 2 days		Not septic	2	0	Post-op/surgical	No shock	Not Onc	Survivor	1
1128	2.28	Female	Black	17.5	4	0	0	0	1	9.9	72	1	9	LOS > 2 days	0.63	Not septic	1	0	Medical	No shock	Not Onc	Survivor	0
1131	0.09	Female	Hispanic	18.1	4	0	0	0	1	10.3	100.3	1	5	LOS > 2 days	0.99	Not septic	1	0	Medical	No shock	Not Onc	Survivor	0
1132	4	Female	Hispanic	15.9	4	0	0	0	1	11.3	82.1	0	15	LOS > 2 days	14.2	Septic	11	1	Medical	Yes shock	Not Onc	Survivor	0
1133	8.28	Female	Hispanic	12.2	1	1	0	0	0	13.3	83.5	0	4	LOS > 2 days		Not septic	7	0	Post-op/surgical	No shock	Not Onc	Survivor	0
1134	4.09	Female	Hispanic	15.1	3	0	0	1	0	11.5	73.5	0	5	LOS > 2 days	2.95	Not septic	1	0	Medical	No shock	Not Onc	Survivor	0
1137	0.33	Female	White	15.2	3	0	0	1	0	8.9	94.9	1	1	LOS > 2 days	17.8	Septic	12	2	Medical	Yes shock	Not Onc	Non-survivor	1
1138	1.75	Female	Hispanic	13.1	1	1	0	0	0	13	89.8	0	11	LOS > 2 days	0.07	Not septic	7	0	Post-op/surgical	No shock	Not Onc	Survivor	1
1149	16.92	Male	Black	12.1	1	1	0	0	0	13.7	85.5	0	8	LOS > 2 days		Not septic	2	10	Medical	No shock	Not Onc	Survivor	1
1158	0.17	Female	Hispanic	15.2	3	0	0	1	0	8.5	89.4	1	12	LOS > 2 days	22.6	Septic	11	1	Medical	Yes shock	Not Onc	Survivor	1
1159	4.15	Male	White	13	1	1	0	0	0	11	76.6	0	2	LOS < 2 days	0.14	Not septic	2	0	Post-op/surgical	No shock	Not Onc	Survivor	1
1161	11.98	Male	Black	13.1	1	1	0	0	0	10.6	80.4	1	2	LOS < 2 days	0.13	Not septic	2	0	Post-op/surgical	No shock	Not Onc	Survivor	1
1176	3	Male	Black	20.3	4	0	0	0	1	3.2	74.4	1	4	LOS > 2 days		Not septic	5	3	Medical	No shock	Not Onc	Survivor	1
1178	12.26	Female	Other	14.2	2	0	1	0	0	14.1	86.4	0	2	LOS < 2 days	0.75	Not septic	8	0	Post-op/surgical	No shock	Not Onc	Survivor	1
1185	3.58	Male	Black	13.6	2	0	1	0	0	11	82.6	0	2	LOS < 2 days		Not septic	7	0	Post-op/surgical	No shock	Not Onc	Survivor	0
1193	0.77	Male	Other	14.4	3	0	0	1	0	11.8	81	0	6	LOS > 2 days	2.06	Not septic	2	0	Post-op/surgical	No shock	Not Onc	Survivor	1
1194	3.82	Female	White	15.1	3	0	0	1	0	12.1	84.6	0	2	LOS < 2 days	0.4	Not septic	6	0	Post-op/surgical	No shock	Not Onc	Survivor	1
1224	1.5	Male	Hispanic	16.5	4	0	0	0	1	10.2	88.9	1	10	LOS > 2 days	19.9	Septic	11	10	Medical	Yes shock	Not Onc	Non-survivor	0
1247	1.38	Female	Other	14.6	3	0	0	1	0	21.8	86.4	0	11	LOS > 2 days	0.18	Not septic	1	2	Medical	No shock	Not Onc	Survivor	1
1258	0.6	Female	White	13.5	2	0	1	0	0	12.8	81.1	0	1	LOS < 2 days	0.12	Not septic	2	0	Post-op/surgical	No shock	Not Onc	Survivor	1
1262	9	Male	White	13.1	1	1	0	0	0	14.4	86.9	0	7	LOS > 2 days	7.2	Septic	11	3	Medical	Yes shock	Yes Onc	Survivor	0
1268	14	Female	Hispanic	15.9	4	0	0	0	1	9	90.2	1	11	LOS > 2 days	2	Septic	11	1	Medical	Yes shock	Not Onc	Survivor	0
1269	15	Female	Hispanic	13.6	2	0	1	0	0	10.4	85.2	1	8	LOS > 2 days	61	Septic	11	3	Medical	Yes shock	Not Onc	Non-survivor	1
1270	16	Female	Black	16	4	0	0	0	1	10	82	1	13	LOS > 2 days	11.3	Septic	11	0	Medical	Yes shock	Not Onc	Survivor	0
1272	2.89	Male	White	15.3	3	0	0	1	0	17	87.7	0	5	LOS > 2 days	0.8	Not septic	1	2	Medical	No shock	Not Onc	Survivor	0
1276	4.07	Female	White	13.3	1	1	0	0	0	11	81.2	0	3	LOS > 2 days		Not septic	1	0	Medical	No shock	Not Onc	Survivor	1
1283	18.45	Female	White	15	3	0	0	1	0	8.6	87.6	1	11	LOS > 2 days		Not septic	6	0	Post-op/surgical	No shock	Not Onc	Survivor	1
1288	4.21	Male	White	16	4	0	0	0	1	7.4	84.8	1	4	LOS > 2 days	0.16	Not septic	4	0	Medical	No shock	Not Onc	Survivor	0
1297	14	Female	Hispanic	15.6	3	0	0	1	1	7.9	92.2	1	2	LOS < 2 days	14.4	Septic	11	3	Medical	Yes shock	Yes Onc	Survivor	1
1298	4.38	Female	White	19	4	0	0	0	1	13.6	74.3	0	43	LOS > 2 days		Not septic	2	0	Post-op/surgical	No shock	Not Onc	Survivor	1
1304	4.9	Male	White	17.8	4	0	0	0	1	5.9	80.9	1	1	LOS < 2 days	0.87	Not septic	12	3	Medical	No shock	Not Onc	Survivor	0
1310	16	Male	White	20.7	4	0	0	0	1	8	83.3	1	46	LOS > 2 days	0.8	Septic	11	10	Medical	Yes shock	Not Onc	Non-survivor	1
1315	3.85	Female	Black	14.6	3	0	0	1	0	13.9	79	0	2	LOS < 2 days		Not septic	4	0	Medical	No shock	Not Onc	Survivor	1
1321	15	Male	Hispanic	14	2	0	1	0	0	18.9	82.7	0	3	LOS > 2 days	1.8	Septic	11	10	Medical	Yes shock	Not Onc	Survivor	1
1333	20.95	Female	White	19	4	0	0	0	1	10.9	103.5	1	3	LOS > 2 days		Not septic	6	0	Medical	No shock	Not Onc	Non-survivor	0
1335	3	Female	Black	15.4	3	0	0	1	1	9.8	77.3	1	11	LOS > 2 days	2.1	Septic	11	4	Medical	No shock	Not Onc	Survivor	1
1362	0.75	Male	White	17.7	4	0	0	0	1	8.6	93.1	1	14	LOS > 2 days	4.1	Not septic	12	5	Post-op/surgical	Yes shock	Not Onc	Survivor	1
1369	1.3	Female	Hispanic	22.1	4	0	0	0	1	12	72.8	0	1	LOS > 2 days	72	Not septic	12	1	Medical	Yes shock	Not Onc	Non-survivor	0
1387	1.33	Female	Black	13.1	1	1	0	0	0	12.2	77.5	0	2	LOS < 2 days	1.33	Septic	11	11	Medical	Yes shock	Not Onc	Survivor	1
1389	18.51	Male	White	15.5	3	0	0	1	1	7.8	88	1	13	LOS > 2 days	0.1	Not septic	11	5	Medical	No shock	Not Onc	Survivor	1
1394	19	Female	Other	12.8	1	1	0	0	0	12.3	84.6	0	7	LOS > 2 days		Not septic	5	1	Medical	No shock	Not Onc	Survivor	1
1395	3.28	Female	Black	12.5	1	1	0	0	0	14	88.2	0	3	LOS > 2 days	0.24	Not septic	1	0	Medical	No shock	Not Onc	Survivor	1
1397	4.81	Male	White	16	4	0	0	0	1	10.5	59.4	1	1	LOS < 2 days	0.87	Not septic	1	0	Medical	No shock	Not Onc	Survivor	1
1399	4.4	Female	Hispanic	18.4	4	0	0	0	1	9	80.8	1	1	LOS < 2 days	0.2	Not septic	1	0	Medical	No shock	Not Onc	Survivor	0
1418	15	Female	White	15.3	3	0	0	1	0	7.9	86.8	1	4	LOS > 2 days	5.5	Septic	11	3	Medical	Yes shock	Yes Onc	Survivor	1
1423	11	Female	Other	19	4	0	0	0	1	12.7	70.7	0	7	LOS > 2 days	1.7	Septic	11	10	Medical	No shock	Not Onc	Survivor	1
1432	14	Male	White	14.4	3	0	0	1	0	7.6	77.7	1	12	LOS > 2 days	5.8	Septic	12	3	Medical	Yes shock	Yes Onc	Survivor	1
1437	6	Male	Black	17.5	4	0	0	0	1	10.8	69.4	1	4	LOS > 2 days	3.3	Septic	11	10	Medical	Yes shock	Not Onc	Survivor	1
1441	13	Female	White	17.7	4	0	0	0	1	11	83.8	1	10	LOS > 2 days	6.7	Septic	11	3	Medical	Yes shock	Yes Onc	Survivor	1
1450	18.14	Male	Hispanic	12.9	1	1	0	0	0	14.1	88.8	0	1	LOS < 2 days	0.06	Not septic	2	0	Post-op/surgical	No shock	Not Onc	Survivor	1
1457	2.94	Male	White	14.3	2	0	1	0	0	14.4	79.2	0	8	LOS > 2 days		Not septic	2	0	Post-op/surgical	No shock	Not Onc	Survivor	1
1461	0.5	Male	White	22	4	0	0	0	1	7.7	90.7	1	9	LOS > 2 days	4.5	Septic	11	5	Medical	No shock	Not Onc	Survivor	1
1467	1.09	Female	White	12	1	1	0	0	0	10.5	83.6	1	1	LOS < 2 days	0.11	Not septic	2	0	Post-op/surgical	No shock	Not Onc	Survivor	1
1475	7.25	Female	White	12.5	1	1	0	0	0	13.5	83.4	0	1	LOS < 2 days		Not septic	6	1	Medical	No shock	Not Onc	Survivor	0
1479	6	Female	White	14.6	3	0	0	1	0	6.8	93	1	4	LOS > 2 days	1.2	Septic	11	3	Medical	Yes shock	Yes Onc	Survivor	0
1480	1.33	Male	Other	13.4	2	0	1	0	0	8.6	86.7	1	6	LOS > 2 days	3	Septic	11	10	Medical	No shock	Not Onc	Non-survivor	1
1484	2	Male	White	16.1	4	0	0	0	1	9.5	84.1	1	5	LOS > 2 days	0.8	Septic	11	6	Medical	No shock	Not Onc	Survivor	0
1487	4.38	Female	White	16	4	0	0	0	1	3.7	70.5	1	1	LOS < 2 days	0.8	Not septic	3	0	Medical	No shock	Not Onc	Survivor	0
1494	3.8	Male	White	14.1	2	0	1	0	0	11.5	90.5	0	38	LOS > 2 days		Not septic	1	0	Medical	No shock	Not Onc	Survivor	1
1508	15	Female	Other	17.1	4	0	0	0	1	11.5	71.1	1	17	LOS > 2 days	15	Septic	12	2	Medical	Yes shock	Not Onc	Non-survivor	0
1511	3.25	Male	Hispanic	26.5	4	0	0	0	1	3.7	52.5	1	3	LOS > 2 days		Not septic	6	0	Medical	No shock	Not Onc	Survivor	1
1512	16	Male	Black	13.4	2	0	1	0	0	12.6	81.2	1	7	LOS > 2 days	5.8	Septic	11	1	Medical	Yes shock	Not Onc	Survivor	0
1524	0.17	Male	Other	14.8	3	0	0	1	0	8.1	97	1	7	LOS > 2 days	0.7	Septic	11	1	Medical	Yes shock	Not Onc	Survivor	1
1533	2	Male	Hispanic	19.1	4	0	0	0	1	11	81.2	0	16	LOS > 2 days	0.2	Not septic	12	2	Medical	Yes shock	Not Onc	Non-survivor	1
1535	3.57	Female	Black	14.7	3	0	0	1	0	12.2	87.3	0	20	LOS > 2 days		Not septic	7	1	Post-op/surgical	No shock	Not Onc	Survivor	0
1542	2	Male	White	14.3	2	0	1	0	0	11.5	76.1	0	5	LOS > 2 days	1.1	Septic	11	4	Medical	No shock	Not Onc	Survivor	0
1550	5	Female	White	18.1	4	0	0	0	1	7.9	90.4	1	108	LOS > 2 days	26.6	Not septic	11	2	Post-op/surgical	Yes shock	Not Onc	Non-survivor	1
1562	2	Male	White	12.2	1	1	0	0	0	13	85.7	0	11	LOS > 2 days	0.9	Not septic	6	3	Medical	No shock	Yes Onc	Survivor	1
1564	6.56	Male	White	14.8	3	0	0	1	0	14	76.7	0	5	LOS > 2 days		Not septic	1	3	Medical	No shock	Yes Onc	Non-survivor	0
1584	14.13	Female	White	12.6	1	1	0	0	0	12.2	79.2	0	3	LOS > 2 days		Not septic	6	0	Post-op/surgical	No shock	Not Onc	Survivor	1
1600	3.65	Male	Black	14.3	2	0	1	0	0	14.5	87.9	0	19	LOS > 2 days		Not septic	2	0	Post-op/surgical	No shock	Not Onc	Survivor	1
1605	11	Male	White	19.5	4	0	0	0	1	8.2	76.4	1	6	LOS > 2 days	1.2	Septic	11	10	Medical	Yes shock	Not Onc	Survivor	1
1608	6	Male	White	12.5	1	1	0	0	0	5.5	93.5	1	1	LOS > 2 days	81.3	Septic	12	2	Medical	Yes shock	Not Onc	Non-survivor	1
1615	5.92	Female	Other	13.3	1	1	0	0	0	11.2	82.5	1	2	LOS < 2 days		Not septic	6	11	Medical	No shock	Not Onc	Survivor	0
1621	0.5	Male	White	15.9	4	0	0	0	1	9.4	83.6	1	33	LOS > 2 days	5.2	Not septic	5	0	Medical	No shock	Not Onc	Survivor	1
1623	3	Female	White	13.4	2	0	1	0	0	10.8	81.4	1	24	LOS > 2 days	6.5	Not septic	12	5	Post-op/surgical	Yes shock	Not Onc	Survivor	1
1625	11	Female	White	12.2	1	1	0	0	0	10.8	83.1	1	13	LOS > 2 days	0.8	Septic	11	2	Medical	No shock	Not Onc	Survivor	1
1631	17	Male	White	17.2	4	0	0	0	1	10.8	93.1	1	23	LOS > 2 days	4.2	Septic	11	3	Medical	Yes shock	Not Onc	Non-survivor	1
1643	2.73	Male	Other	17	4	0	0	0	1	11.2	73.2	0	3	LOS > 2 days		Not septic	1	2	Medical	No shock	Not Onc	Survivor	1
1646	9	Female	White	13.1	1	1	0	0	0	8	79.3	1	3	LOS > 2 days	1.2	Septic	11	3	Medical	Yes shock	Yes Onc	Survivor	1
1655	2	Female	White	13.2	1	1	0	0	0	12.3	78.6	0	1	LOS < 2 days		Not septic	1	0	Post-op/surgical	No shock	Not Onc	Survivor	0
1665	17.58	Male	Black	13.6	2	0	1	0	0	14.9	95.7	0	1	LOS < 2 days		Not septic	1	3	Medical	No shock	Yes Onc	Survivor	0
1671	1.95	Male	White	12.3	1	1	0	0	0	13.1	82.6	0	4	LOS > 2 days		Not septic	1	0	Medical	No shock	Not Onc	Survivor	1
1698	1	Female	Other	14.3	2	0	1	0	0	11.5	84.8	0	4	LOS > 2 days		Not septic	1	0	Medical	No shock	Not Onc	Survivor	1
1699	4.07	Male	White	15.4	3	0	0	1	1	11.8	70.9	0	4	LOS > 2 days		Not septic	6	0	Medical	No shock	Not Onc	Survivor	1
1709	10.96	Male	Black	19.3	4	0	0	0	1	8	105.1	1	7	LOS > 2 days		Not septic	3	0	Medical	No shock	Yes Onc	Survivor	1
1718	3.53	Female	Black	13.2	1	1	0	0	0	9.9	78.3	1	14	LOS > 2 days		Not septic	7	0	Post-op/surgical	No shock	Not Onc	Survivor	1
1722	6	Male	White	12.7	1	1	0	0	0	10.9	98.4	1	4	LOS > 2 days	1.3	Septic	11	10	Medical	Yes shock	Not Onc	Survivor	1
1739	11	Female	White	12.9	1	1	0	0	0	8.7	75.7	1	56	LOS > 2 days	3.1	Septic	11	0	Post-op/surgical	Yes shock	Not Onc	Survivor	1
1747	12.37	Female	White	20.2	4	0	0	0	1	9.5	100.9	1	23	LOS > 2 days	8.7	Not septic	12	5	Post-op/surgical	Yes shock	Yes Onc	Survivor	1
1759	3.04	Male	White	12.1	1	1	0	0	0	14.5	88.8	0	14	LOS > 2 days		Not septic	1	6	Medical	No shock	Not Onc	Survivor	1
1762	3.76	Male	Black	12.7	1	1	0	0	0	12.1	82.4	0	4	LOS > 2 days		Not septic	5	3	Medical	No shock	Yes Onc	Survivor	1
1780	0.68	Male	White	14.4	3	0	0	1	0	11.7	79.5	0	16	LOS > 2 days		Not septic	2	0	Post-op/surgical	No shock	Not Onc	Survivor	1
1781	2.82	Male	White	14	2	0	1	0	0	13	78.9	0	9	LOS > 2 days		Not septic	2	0	Post-op/surgical	No shock	Not Onc	Survivor	1
1783	7	Female	Black	15.5	3	0	0	1	1	11.2	82.7	1	27	LOS > 2 days	0.3	Not septic	12	3	Post-op/surgical	Yes shock	Yes Onc	Survivor	1
1784	2.03	Female	Hispanic	12	1	1	0	0	0	11.7	91.9	0	17	LOS > 2 days		Not septic	2	0	Post-op/surgical	No shock	Not Onc	Survivor	1
1785	0.2	Male	Hispanic	16.2	4	0	0	0	1	17	80.1	0	16	LOS > 2 days		Not septic	2	0	Post-op/surgical	No shock	Not Onc	Survivor	1
1786	1.75	Female	Hispanic	13.4	2	0	1	0	0	11.6	89.9	0	3	LOS > 2 days	9.3	Septic	11	11	Medical	Yes shock	Not Onc	Survivor	0
1787	4.39	Female	Hispanic	12.6	1	1	0	0	0	11.9	82.2	0	2	LOS < 2 days		Not septic	2	0	Post-op/surgical	No shock	Not Onc	Survivor	1
1788	0.65	Female	White	13.3	1	1	0	0	0	10.3	84.9	1	4	LOS > 2 days		Not septic	2	2	Medical	No shock	Not Onc	Survivor	0
1789	0.16	Male	Black	15.4	3	0	0	1	1	9.9	88.1	1	4	LOS > 2 days		Not septic	1	0	Medical	No shock	Not Onc	Survivor	1
1790	0.53	Female	White	13.5	2	0	1	0	0	14.7	86.7	0	3	LOS > 2 days		Not septic	6	2	Medical	No shock	Not Onc	Survivor	1
1792	12.76	Female	Black	12.4	1	1	0	0	0	14.4	82.9	0	5	LOS > 2 days		Not septic	7	0	Post-op/surgical	No shock	Not Onc	Survivor	1
1793	16.7	Male	White	12.5	1	1	0	0	0	14.9	82.4	0	2	LOS < 2 days		Not septic	2	0	Medical	No shock	Not Onc	Survivor	0
1795	3	Male	White	16.4	4	0	0	0	1	9.2	74	1	11	LOS > 2 days	0.9	Septic	11	5	Medical	Yes shock	Not Onc	Survivor	1
1797	14	Female	Black	15.3	3	0	0	1	0	8.5	91.9	1	26	LOS > 2 days	14.7	Septic	11	3	Medical	Yes shock	Yes Onc	Survivor	1
1800	9	Male	Black	14.1	2	0	1	0	0	12.4	101.2	0	3	LOS > 2 days	14.9	Septic	12	5	Medical	Yes shock	Not Onc	Survivor	0
1801	1.75	Male	Black	15.4	3	0	0	1	1	10.8	75.5	1	18	LOS > 2 days	0.8	Septic	11	5	Medical	No shock	Not Onc	Survivor	1
1802	9	Male	Hispanic	15	3	0	0	1	0	10.7	81.7	1	18	LOS > 2 days	5.1	Not septic	12	2	Medical	Yes shock	Not Onc	Non-survivor	0
1804	6	Male	Hispanic	17.7	4	0	0	0	1	6.8	84.1	1	38	LOS > 2 days	0.8	Septic	11	1	Medical	Yes shock	Not Onc	Non-survivor	1
1805	0.08	Female	Black	17.4	4	0	0	0	1	14.8	119.2	0	4	LOS > 2 days	55.8	Not septic	12	2	Medical	Yes shock	Not Onc	Survivor	0
1806	11	Female	Hispanic	14.6	3	0	0	1	0	8	89.4	1	8	LOS > 2 days	1.6	Septic	11	5	Post-op/surgical	Yes shock	Not Onc	Survivor	1
1807	1.75	Female	White	13.6	2	0	1	0	0	9.7	79.2	1	12	LOS > 2 days	2	Septic	11	0	Medical	Yes shock	Not Onc	Survivor	0
1808	0.75	Male	Hispanic	16	4	0	0	0	1	7.8	78.6	1	10	LOS > 2 days	6	Septic	11	5	Medical	Yes shock	Not Onc	Survivor	1
